# Supplementary material
Source: publisher site journal article supplement (https://www.dovepress.com/article/268105)
Supplement: Supplementary file 1 [file get_supplementary_file.php]

Supplementary materials

| TABLE S1. Search strategy in PubMed | | |
| --- | --- | --- |
| Date of search: 2018-9-19  Number of hits: 533 | | |
| 1. | "Stroke"[Mesh] | 118408 |
| 2. | stroke[Title/Abstract] OR Strokes[Title/Abstract] OR "Cerebrovascular Accident"[Title/Abstract] OR "Cerebrovascular Accidents"[Title/Abstract] OR CVA [Title/Abstract] OR CVAs[Title/Abstract] OR "Cerebrovascular Apoplexy"[Title/Abstract] OR "Apoplexy, Cerebrovascular"[Title/Abstract] OR "Vascular Accident, Brain"[Title/Abstract] OR "Brain Vascular Accident"[Title/Abstract] OR "Brain Vascular Accidents"[Title/Abstract] OR "Vascular Accidents, Brain"[Title/Abstract] OR "Cerebrovascular Stroke"[Title/Abstract] OR "Cerebrovascular Strokes"[Title/Abstract] OR "Stroke, Cerebrovascular"[Title/Abstract] OR "Strokes, Cerebrovascular"[Title/Abstract] OR Apoplexy[Title/Abstract] OR "Cerebral Stroke"[Title/Abstract] OR "Cerebral Strokes"[Title/Abstract] OR "Stroke, Cerebral"[Title/Abstract] OR "Strokes, Cerebral"[Title/Abstract] | 230024 |
| 3. | #1 OR #2 | 261696 |
| 4. | "Cerebrovascular Disorders"[Mesh] | 339976 |
| 5. | "Cerebrovascular Disorder"[Title/Abstract] OR "Vascular Diseases, Intracranial"[Title/Abstract] OR "Intracranial Vascular Disease"[Title/Abstract] OR "Intracranial Vascular Diseases"[Title/Abstract] OR "Vascular Disease, Intracranial"[Title/Abstract] OR "Intracranial Vascular Disorders"[Title/Abstract] OR "Intracranial Vascular Disorder"[Title/Abstract] OR "Vascular Disorder, Intracranial"[Title/Abstract] OR "Vascular Disorders, Intracranial"[Title/Abstract] OR "Cerebrovascular Diseases"[Title/Abstract] OR "Cerebrovascular Disease"[Title/Abstract] OR "Disease, Cerebrovascular"[Title/Abstract] OR "Diseases, Cerebrovascular"[Title/Abstract] OR "Brain Vascular Disorders"[Title/Abstract] OR "Brain Vascular Disorder"[Title/Abstract] OR "Vascular Disorder, Brain"[Title/Abstract] OR "Vascular Disorders, Brain"[Title/Abstract] OR "Cerebrovascular Occlusion"[Title/Abstract] OR "Cerebrovascular Occlusions"[Title/Abstract] OR "Occlusion, Cerebrovascular"[Title/Abstract] OR "Occlusions, Cerebrovascular"[Title/Abstract] OR "Cerebrovascular Insufficiency"[Title/Abstract] OR "Cerebrovascular Insufficiencies"[Title/Abstract] OR "Insufficiencies, Cerebrovascular"[Title/Abstract] OR "Insufficiency, Cerebrovascular"[Title/Abstract] | 20285 |
| 6. | #4 OR #5 | 348576 |
| 7. | #3 OR #6 | 456371 |
| 8. | "Adrenergic Beta-Antagonists"[Mesh] OR "Adrenergic beta-Antagonists" [Pharmacological Action] | 83174 |
| 9. | "Adrenergic beta-Antagonists"[Title/Abstract] OR "Adrenergic beta Antagonists"[Title/Abstract] OR "beta-Antagonists, Adrenergic"[Title/Abstract] OR "beta-Adrenergic Receptor Blockaders"[Title/Abstract] OR "Blockaders, beta-Adrenergic Receptor"[Title/Abstract] OR "Receptor Blockaders, beta-Adrenergic"[Title/Abstract] OR "beta Adrenergic Receptor Blockaders"[Title/Abstract] OR "beta-Adrenergic Blockers"[Title/Abstract] OR "Blockers, beta-Adrenergic"[Title/Abstract] OR "beta Adrenergic Blockers"[Title/Abstract] OR "beta-Blockers, Adrenergic"[Title/Abstract] OR "Adrenergic beta-Blockers"[Title/Abstract] OR "beta Blockers, Adrenergic"[Title/Abstract] OR "Adrenergic beta-Receptor Blockaders"[Title/Abstract] OR "Adrenergic beta Receptor Blockaders"[Title/Abstract] OR "Blockaders, Adrenergic beta-Receptor"[Title/Abstract] OR "beta-Receptor Blockaders, Adrenergic"[Title/Abstract] OR "beta-Adrenergic Blocking Agents"[Title/Abstract] OR "Agents, beta-Adrenergic Blocking"[Title/Abstract] OR "Blocking Agents, beta-Adrenergic"[Title/Abstract] OR "beta Adrenergic Blocking Agents"[Title/Abstract] | 2019 |
| 10. | #8 OR #9 | 83818 |
| 11. | "Treatment Outcome"[Mesh] | 946198 |
| 12. | "Treatment Outcome"[Title/Abstract] OR "Outcome, Treatment"[Title/Abstract] OR "Clinical Effectiveness"[Title/Abstract] OR "Clinical Effectivenesses"[Title/Abstract] OR "Effectiveness, Clinical"[Title/Abstract] OR "Effectivenesses, Clinical"[Title/Abstract] OR "Patient-Relevant Outcome"[Title/Abstract] OR "Outcome, Patient-Relevant"[Title/Abstract] OR "Outcomes, Patient-Relevant"[Title/Abstract] OR "Patient Relevant Outcome"[Title/Abstract] OR "Patient-Relevant Outcomes"[Title/Abstract] OR "Clinical Efficacy"[Title/Abstract] OR "Efficacy, Clinical"[Title/Abstract] OR "Treatment Effectiveness"[Title/Abstract] OR "Effectiveness, Treatment"[Title/Abstract] OR "Treatment Efficacy"[Title/Abstract] OR "Efficacy, Treatment"[Title/Abstract] OR "Rehabilitation Outcome"[Title/Abstract] OR "Outcome, Rehabilitation"[Title/Abstract] | 81079 |
| 13. | #11 OR #12 | 1001538 |
| 14. | "Mortality"[Mesh] | 351228 |
| 15. | Mortality[Title/Abstract] OR Mortalities[Title/Abstract] OR "Case Fatality Rate"[Title/Abstract] OR "Case Fatality Rates"[Title/Abstract] OR "Rate, Case Fatality"[Title/Abstract] OR "Rates, Case Fatality"[Title/Abstract] OR "Mortality, Excess"[Title/Abstract] OR "Excess Mortalities"[Title/Abstract] OR "Mortalities, Excess"[Title/Abstract] OR "Excess Mortality"[Title/Abstract] OR "Decline, Mortality"[Title/Abstract] OR "Declines, Mortality"[Title/Abstract] OR "Mortality Declines"[Title/Abstract] OR "Mortality Decline"[Title/Abstract] OR "Mortality Determinants"[Title/Abstract] OR "Determinant, Mortality"[Title/Abstract] OR "Mortality Determinant"[Title/Abstract] OR "Determinants, Mortality"[Title/Abstract] OR "Mortality, Differential"[Title/Abstract] OR "Differential Mortalities"[Title/Abstract] OR "Mortalities, Differential"[Title/Abstract] OR "Differential Mortality"[Title/Abstract] OR "Age-Specific Death Rate"[Title/Abstract] OR "Age-Specific Death Rates"[Title/Abstract] OR "Death Rate, Age-Specific"[Title/Abstract] OR "Death Rates, Age-Specific"[Title/Abstract] OR "Rate, Age-Specific Death"[Title/Abstract] OR "Rates, Age-Specific Death"[Title/Abstract] OR "Age Specific Death Rate"[Title/Abstract] OR "Death Rate"[Title/Abstract] OR "Death Rates"[Title/Abstract] OR "Rate, Death"[Title/Abstract] OR "Rates, Death"[Title/Abstract] OR "Mortality Rate"[Title/Abstract] OR "Mortality Rates"[Title/Abstract] OR "Rate, Mortality"[Title/Abstract] OR "Rates, Mortality"[Title/Abstract] | 682931 |
| 16. | #14 OR #15 | 913588 |
| 17. | #13 OR #16 | 1779016 |
| 18. | #7 AND #10 AND #17 | 533 |

| TABLE S2. Search strategy in Medline | | |
| --- | --- | --- |
| Date of search: 2018-9-19  Number of hits: 1042 | | |
| 1. | Stroke OR Strokes OR (Cerebrovascular Accident) OR (Cerebrovascular Accidents) OR CVA OR CVAs OR (Cerebrovascular Apoplexy) OR (Apoplexy, Cerebrovascular) OR (Vascular Accident, Brain) OR (Brain Vascular Accident) OR (Brain Vascular Accidents) OR (Vascular Accidents, Brain) OR (Cerebrovascular Stroke) OR (Cerebrovascular Strokes) OR (Stroke, Cerebrovascular) OR (Strokes, Cerebrovascular) OR Apoplexy OR (Cerebral Stroke) OR (Cerebral Strokes) OR (Stroke, Cerebral) OR (Strokes, Cerebral) | 285653 |
| 2. | (Cerebrovascular Disorder) OR (Vascular Diseases, Intracranial) OR (Intracranial Vascular Disease)OR (Intracranial Vascular Diseases) OR (Vascular Disease, Intracranial) OR (Intracranial Vascular Disorders) OR "Intracranial Vascular Disorder) OR (Vascular Disorder, Intracranial) OR (Vascular Disorders, Intracranial) OR (Cerebrovascular Diseases) OR (Cerebrovascular Disease) OR (Disease, Cerebrovascular) OR (Diseases, Cerebrovascular) OR (Brain Vascular Disorders) OR (Brain Vascular Disorder) OR (Vascular Disorder, Brain) OR (Vascular Disorders, Brain) OR (Cerebrovascular Occlusion) OR (Cerebrovascular Occlusions) OR (Occlusion, Cerebrovascular) OR (Occlusions, Cerebrovascular) OR (Cerebrovascular Insufficiency) OR (Cerebrovascular Insufficiencies) OR (Insufficiencies, Cerebrovascular) OR (Insufficiency, Cerebrovascular) | 103256 |
| 3. | #1 OR #2 | 350829 |
| 4. | (Adrenergic beta-Antagonists) OR (Adrenergic beta Antagonists) OR (beta-Antagonists, Adrenergic) OR (beta-Adrenergic Receptor Blockaders) OR (Blockaders, beta-Adrenergic Receptor) OR (Receptor Blockaders, beta-Adrenergic) OR (beta Adrenergic Receptor Blockaders) OR (beta-Adrenergic Blockers) OR (Blockers, beta-Adrenergic) OR (beta Adrenergic Blockers) OR (beta-Blockers, Adrenergic) OR (Adrenergic beta-Blockers) OR (beta Blockers, Adrenergic) OR (Adrenergic beta-Receptor Blockaders) OR (Adrenergic beta Receptor Blockaders) OR (Blockaders, Adrenergic beta-Receptor) OR (beta-Receptor Blockaders, Adrenergic) OR (beta-Adrenergic Blocking Agents) OR (Agents, beta-Adrenergic Blocking) OR (Blocking Agents, beta-Adrenergic) OR (beta Adrenergic Blocking Agents) | 54190 |
| 5. | (Treatment Outcome) OR (Outcome, Treatment) OR (Clinical Effectiveness) OR (Clinical Effectivenesses) OR (Effectiveness, Clinical) OR (Effectivenesses, Clinical) OR (Patient-Relevant Outcome) OR (Outcome, Patient-Relevant) OR (Outcomes, Patient-Relevant) OR (Patient Relevant Outcome) OR (Patient-Relevant Outcomes) OR (Clinical Efficacy) OR (Efficacy, Clinical) OR (Treatment Effectiveness) OR (Effectiveness, Treatment) OR (Treatment Efficacy) OR (Efficacy, Treatment) OR (Rehabilitation Outcome) OR (Outcome, Rehabilitation) | 1752763 |
| 6. | Mortality OR Mortalities OR (Case Fatality Rate) OR (Case Fatality Rates) OR (Rate, Case Fatality) OR (Rates, Case Fatality) OR (Mortality, Excess) OR (Excess Mortalities) OR (Mortalities, Excess) OR (Excess Mortality) OR (Decline, Mortality) OR (Declines, Mortality) OR (Mortality Declines) OR (Mortality Decline) OR (Mortality Determinants) OR (Determinant, Mortality) OR (Mortality Determinant) OR (Determinants, Mortality) OR (Mortality, Differential) OR (Differential Mortalities) OR (Mortalities, Differential) OR (Differential Mortality) OR (Age-Specific Death Rate) OR (Age-Specific Death Rates) OR (Death Rate, Age-Specific) OR (Death Rates, Age-Specific) OR (Rate, Age-Specific Death) OR (Rates, Age-Specific Death) OR (Age Specific Death Rate) OR (Death Rate) OR (Death Rates) OR (Rate, Death) OR (Rates, Death) OR (Mortality Rate) OR (Mortality Rates) OR (Rate, Mortality) OR (Rates, Mortality) | 1118253 |
| 7. | #5 OR #6 | 2606116 |
| 8. | #3 AND #4 AND #7 | 1042 |

| TABLE S3. Search strategy in Scopus | | |
| --- | --- | --- |
| Date of search: 2018-9-19  Number of hits: 3477 | | |
| 1. | stroke OR Strokes OR "Cerebrovascular Accident" OR "Cerebrovascular Accidents" OR CVA OR CVAs OR "Cerebrovascular Apoplexy" OR "Apoplexy, Cerebrovascular" OR "Vascular Accident, Brain" OR "Brain Vascular Accident" OR "Brain Vascular Accidents" OR "Vascular Accidents, Brain" OR "Cerebrovascular Stroke" OR "Cerebrovascular Strokes" OR "Stroke, Cerebrovascular" OR "Strokes, Cerebrovascular" OR Apoplexy OR "Cerebral Stroke" OR "Cerebral Strokes" OR "Stroke, Cerebral" OR "Strokes, Cerebral" | 1104917 |
| 2. | "Cerebrovascular Disorder" OR "Vascular Diseases, Intracranial" OR "Intracranial Vascular Disease" OR "Intracranial Vascular Diseases" OR "Vascular Disease, Intracranial" OR "Intracranial Vascular Disorders" OR "Intracranial Vascular Disorder" OR "Vascular Disorder, Intracranial" OR "Vascular Disorders, Intracranial" OR "Cerebrovascular Diseases" OR "Cerebrovascular Disease" OR "Disease, Cerebrovascular" OR "Diseases, Cerebrovascular" OR "Brain Vascular Disorders" OR "Brain Vascular Disorder" OR "Vascular Disorder, Brain" OR "Vascular Disorders, Brain" OR "Cerebrovascular Occlusion" OR "Cerebrovascular Occlusions" OR "Occlusion, Cerebrovascular" OR "Occlusions, Cerebrovascular" OR "Cerebrovascular Insufficiency" OR "Cerebrovascular Insufficiencies" OR "Insufficiencies, Cerebrovascular" OR "Insufficiency, Cerebrovascular" | 213337 |
| 3. | #1 OR #2 | 1164052 |
| 4. | "Adrenergic beta-Antagonists" OR "Adrenergic beta Antagonists" OR "beta-Antagonists, Adrenergic" OR "beta-Adrenergic Receptor Blockaders" OR "Blockaders, beta-Adrenergic Receptor" OR "Receptor Blockaders, beta-Adrenergic" OR "beta Adrenergic Receptor Blockaders" OR "beta-Adrenergic Blockers" OR "Blockers, beta-Adrenergic" OR "beta Adrenergic Blockers" OR "beta-Blockers, Adrenergic" OR "Adrenergic beta-Blockers" OR "beta Blockers, Adrenergic" OR "Adrenergic beta-Receptor Blockaders" OR "Adrenergic beta Receptor Blockaders" OR "Blockaders, Adrenergic beta-Receptor" OR "beta-Receptor Blockaders, Adrenergic" OR "beta-Adrenergic Blocking Agents" OR "Agents, beta-Adrenergic Blocking" OR "Blocking Agents, beta-Adrenergic" OR "beta Adrenergic Blocking Agents" | 47435 |
| 5. | "Treatment Outcome" OR "Outcome, Treatment" OR "Clinical Effectiveness" OR "Clinical Effectivenesses" OR "Effectiveness, Clinical" OR "Effectivenesses, Clinical" OR "Patient-Relevant Outcome" OR "Outcome, Patient-Relevant" OR "Outcomes, Patient-Relevant" OR "Patient Relevant Outcome" OR "Patient-Relevant Outcomes" OR "Clinical Efficacy" OR "Efficacy, Clinical" OR "Treatment Effectiveness" OR "Effectiveness, Treatment" OR "Treatment Efficacy" OR "Efficacy, Treatment" OR "Rehabilitation Outcome" OR "Outcome, Rehabilitation" | 1678803 |
| 6. | Mortality OR Mortalities OR "Case Fatality Rate" OR "Case Fatality Rates" OR "Rate, Case Fatality" OR "Rates, Case Fatality" OR "Mortality, Excess" OR "Excess Mortalities" OR "Mortalities, Excess" OR "Excess Mortality" OR "Decline, Mortality" OR "Declines, Mortality" OR "Mortality Declines" OR "Mortality Decline" OR "Mortality Determinants" OR "Determinant, Mortality" OR "Mortality Determinant" OR "Determinants, Mortality" OR "Mortality, Differential" OR "Differential Mortalities" OR "Mortalities, Differential" OR "Differential Mortality" OR "Age-Specific Death Rate" OR "Age-Specific Death Rates" OR "Death Rate, Age-Specific" OR "Death Rates, Age-Specific" OR "Rate, Age-Specific Death" OR "Rates, Age-Specific Death" OR "Age Specific Death Rate" OR "Death Rate" OR "Death Rates" OR "Rate, Death" OR "Rates, Death" OR "Mortality Rate" OR "Mortality Rates" OR "Rate, Mortality" OR "Rates, Mortality" | 2947434 |
| 7. | #5 OR #6 | 4258533 |
| 8. | #3 AND #4 AND #7 | 4196 |
| 8. | #3 AND #4 AND #7 limited to journals in source type, medicine in subject area and English language | 3477 |

| TABLE S4. Search strategy in Cochrane | | |  |
| --- | --- | --- | --- |
| Date of search: 2018-9-19  Number of hits: 37 reviews, 55 trials | | | |
| 1. | MeSH Stroke | 7850 | |
| 2. | stroke OR Strokes OR "Cerebrovascular Accident" OR "Cerebrovascular Accidents" OR CVA OR CVAs OR "Cerebrovascular Apoplexy" OR "Apoplexy, Cerebrovascular" OR "Vascular Accident, Brain" OR "Brain Vascular Accident" OR "Brain Vascular Accidents" OR "Vascular Accidents, Brain" OR "Cerebrovascular Stroke" OR "Cerebrovascular Strokes" OR "Stroke, Cerebrovascular" OR "Strokes, Cerebrovascular" OR Apoplexy OR "Cerebral Stroke" OR "Cerebral Strokes" OR "Stroke, Cerebral" OR "Strokes, Cerebral" | 56511 | |
| 3. | #1 OR #2 | 56779 | |
| 4. | MeSH Cerebrovascular disorders | 12795 | |
| 5. | "Cerebrovascular Disorder" OR "Vascular Diseases, Intracranial" OR "Intracranial Vascular Disease" OR "Intracranial Vascular Diseases" OR "Vascular Disease, Intracranial" OR "Intracranial Vascular Disorders" OR "Intracranial Vascular Disorder" OR "Vascular Disorder, Intracranial" OR "Vascular Disorders, Intracranial" OR "Cerebrovascular Diseases" OR "Cerebrovascular Disease" OR "Disease, Cerebrovascular" OR "Diseases, Cerebrovascular" OR "Brain Vascular Disorders" OR "Brain Vascular Disorder" OR "Vascular Disorder, Brain" OR "Vascular Disorders, Brain" OR "Cerebrovascular Occlusion" OR "Cerebrovascular Occlusions" OR "Occlusion, Cerebrovascular" OR "Occlusions, Cerebrovascular" OR "Cerebrovascular Insufficiency" OR "Cerebrovascular Insufficiencies" OR "Insufficiencies, Cerebrovascular" OR "Insufficiency, Cerebrovascular" | 5354 | |
| 6. | #4 OR #5 | 17102 | |
| 7. | #3 OR #6 | 60485 | |
| 8. | MeSH Adrenergic Beta-Antagonists Mesh | 4402 | |
| 9. | "Adrenergic beta-Antagonists" OR "Adrenergic beta Antagonists" OR "beta-Antagonists, Adrenergic" OR "beta-Adrenergic Receptor Blockaders" OR "Blockaders, beta-Adrenergic Receptor" OR "Receptor Blockaders, beta-Adrenergic" OR "beta Adrenergic Receptor Blockaders" OR "beta-Adrenergic Blockers" OR "Blockers, beta-Adrenergic" OR "beta Adrenergic Blockers" OR "beta-Blockers, Adrenergic" OR "Adrenergic beta-Blockers" OR "beta Blockers, Adrenergic" OR "Adrenergic beta-Receptor Blockaders" OR "Adrenergic beta Receptor Blockaders" OR "Blockaders, Adrenergic beta-Receptor" OR "beta-Receptor Blockaders, Adrenergic" OR "beta-Adrenergic Blocking Agents" OR "Agents, beta-Adrenergic Blocking" OR "Blocking Agents, beta-Adrenergic" OR "beta Adrenergic Blocking Agents" | 4446 | |
| 10. | #8 OR #9 | 4615 | |
| 11. | MeSH Treatment outcome | 122523 | |
| 12. | "Treatment Outcome" OR "Outcome, Treatment" OR "Clinical Effectiveness" OR "Clinical Effectivenesses" OR "Effectiveness, Clinical" OR "Effectivenesses, Clinical" OR "Patient-Relevant Outcome" OR "Outcome, Patient-Relevant" OR "Outcomes, Patient-Relevant" OR "Patient Relevant Outcome" OR "Patient-Relevant Outcomes" OR "Clinical Efficacy" OR "Efficacy, Clinical" OR "Treatment Effectiveness" OR "Effectiveness, Treatment" OR "Treatment Efficacy" OR "Efficacy, Treatment" OR "Rehabilitation Outcome" OR "Outcome, Rehabilitation" | 168067 | |
| 13. | #11 OR #12 | 170526 | |
| 14. | MeSH Mortality | 12376 | |
| 15 | Mortality OR Mortalities OR "Case Fatality Rate" OR "Case Fatality Rates" OR "Rate, Case Fatality" OR "Rates, Case Fatality" OR "Mortality, Excess" OR "Excess Mortalities" OR "Mortalities, Excess" OR "Excess Mortality" OR "Decline, Mortality" OR "Declines, Mortality" OR "Mortality Declines" OR "Mortality Decline" OR "Mortality Determinants" OR "Determinant, Mortality" OR "Mortality Determinant" OR "Determinants, Mortality" OR "Mortality, Differential" OR "Differential Mortalities" OR "Mortalities, Differential" OR "Differential Mortality" OR "Age-Specific Death Rate" OR "Age-Specific Death Rates" OR "Death Rate, Age-Specific" OR "Death Rates, Age-Specific" OR "Rate, Age-Specific Death" OR "Rates, Age-Specific Death" OR "Age Specific Death Rate" OR "Death Rate" OR "Death Rates" OR "Rate, Death" OR "Rates, Death" OR "Mortality Rate" OR "Mortality Rates" OR "Rate, Mortality" OR "Rates, Mortality" | 72839 | |
| 16. | #14 OR #15 | 75261 | |
| 17. | #13 OR #16 | 226588 | |
| 18. | #7 AND #10 AND #17 | 309 | |
| 19. | #18 limited to Cochrane reviews | 37 | |
| 20. | #18 limited to Cochrane EMBASE trials | 55 | |

| TABLE S5.Characteristics of studies included in the meta-analysis | | | | | | | | | | | | | | | | |
| --- | --- | --- | --- | --- | --- | --- | --- | --- | --- | --- | --- | --- | --- | --- | --- | --- |
| 1st Author (Publication year) | Study design | Study population | **Mortality** | | |  | **Functional outcome** | | |  |  | **Infection** | | |  |  |
| Intervention | Comparison | OR/RR/HR  (95% CI) | Follow-up time | Intervention | Comparison | OR/RR (95% CI) | Definition poor functional outcome | Follow-up time | Intervention | Comparison | OR/RR (95%CI) | Definition infection | Follow-up infection |
| N intervention (N dead) | N comparison (N dead) | N intervention (N poor functional outcome) | N comparison (N poor functional outcome) | N intervention (N with infection) | N comparison (N with infection) |
| Barer DH (1988) [31] | RCT | stroke | 202 (52) | 100 (14) |  | 1-month from ictus |  |  |  |  |  |  |  |  |  |  |
| Dziedzik T (2007) [30] | Observational, retrospective | Ischemic stroke | 88 (6) | 745 (141) | 0.37 (0.16-0.84)a | 30-days from ictus |  |  |  |  |  | 88 (4) | 745 (85) |  | Pneumonia | In-hospital |
| Dowlatshahi D (2009) [32] | cohort | Ischemic stroke | 1591 | 3977 | 1.24 (0.97-1.58)a | In-hospital | 1591 | 3977 | 1.00 (0.84-1.19)a | mRS 4-6 | At discharge |  |  |  |  |  |
| Potter J (2009) [33] | RCT | Ischemic or haemorrhagic stroke | 56 (4) | 116 (19) |  | 3-moths from ictus | 56 (34) | 116 (70) |  | mRS >3 | At 2 weeks from ictus |  |  |  |  |  |
| Fuentes B (2010) [45] | Observational, retrospective | Ischemic stroke |  |  |  |  | 195 | 1773 | 0.980 (0.728-1.318)d | mRS > 2 | At discharge |  |  |  |  |  |
| De Raedt S (2012) [46] | Cohort | Ischemic stroke |  |  |  |  | 103 (52) | 1080 (589) | 0.85 (0.57-1.27)d | mRS >3 | At 3-months from ictus |  |  |  |  |  |
| Kalita J (2013) [34] | observational | Haemorrhagic stroke | 79 (9) | 59 (22) | 0.83 (0.006-1.09)a | 1-month from ictus | 55 (28) | 47 (32) |  | BI ≤ 12 | At 3-months from ictus | 79 (7) | 59 (18) |  | Pneumonia | In-hospital |
| Shoup JP (2014) [35] | Observational, retrospective | Haemorrhagic stroke | 275 (75) | 151 (76) | 0.21 (0.07-0.59)a | In-hospital |  |  |  |  |  | 275 (88) | 151 (24) |  | Infection | In-hospital |
| Maier IL (2015) [36] | Historical cohort | Ischemic or haemorrhagic stroke | 301 (42) | 324 (22) | 1.93 (1.20-3.10)a | 30-day from ictus |  |  |  |  |  | 301 (114) | 324 (123) | 1.00 (0.77-1.30)a | Pneumonia | Within 7 days from ictus |
| Phelan C (2015) [37] | Observational, retrospective | Ischemic stroke | 436 (66) | 2368 (343) | 0.657 (0.655-0.658)a | In-hospital |  |  |  |  |  | 436 (139) | 2368 (633) |  | Infection | In-hospital |
| Sundbøll J (2015) [29] | cohort | Ischemic stroke | 17189 (2389) | 63402 (6213) | 1.01 (0.96- 1.07)b | 30-days from ictus |  |  |  |  |  |  |  |  |  |  |
| Sundbøll J (2015) [29] | cohort | Haemorrhagic stroke | 1913 (802) | 9494 (3162) | 0.95 (0.87-1.04)b | 30-days from ictus |  |  |  |  |  |  |  |  |  |  |
| Sykora M (2015) [38] | Observational | Ischemic stroke | 244 (23) | 4968 (891) | 0.63 (0.42-0.96)c | 3-months from ictus | 234 (105) | 4846 (2016) | 0.96 (0.8-1.15)e | mRS 3-6 | At 3-months from ictus | 244 (9) | 4968 (418) | 0.49 (0.25-0.95)c | Pneumonia | Within 10 days from ictus |
| Tziomalos K (2015) [39] | observational | Ischemic stroke | 183 (18) | 299 (28) |  | In-hospital | 188 (109) | 294 (201) |  | mRS ≥ 2 | At discharge |  |  |  |  |  |
| Westendorp WF (2016) [40] | Observational, exploratory analysis | Ischemic or haemorrhagic stroke | 880 (123) | 1639 (144) | 1.14 (0.84-1.53)a | 3-months from ictus | 880 (392) | 1629 (592) | 1.10 (0.89-1.35)a | mRS 3-6 | At 3-months from ictus | 885 (168) | 1648 (179) | 1.61 (1.19-2.18)a | Infection | In-hospital |
| Koton S (2017) [27] | Observational | Ischemic stroke | 1470 (141) | 1327 (116) | 0.99 (0.74-1.31)a | 1-month mortality | 2026 (1375) | 1866 (1272) | 0.87 (0.73-1.03)a | mRS ≥ 2 | At discharge |  |  |  |  |  |
| Starr JB (2017a) [41] | Observational | Haemorrhagic stroke | 418 (164) | 107 (47) |  | In-hospital | 345 (268) | 94 (71) |  | mRS > 2 | At discharge | 365 (65) | 92 (7) |  | Infection | In-hospital |
| Starr JB (2017b) [42] | Observational | Ischemic stroke | 424 (54) | 424 (52) |  | In-hospital | 339 (221) | 319 (193) |  | mRS > 2 | At discharge | 384 (63) | 384 (41) |  | Infection | In-hospital |
| Eizenberg Y (2018) [28] | Observational | Ischemic or haemorrhagic stroke | 615 (41) | 511 (29) | 0.86 (0.49-1.52)a | 3-months from ictus | 517 (182) | 444 (154) | 1.07 (0.76-1.50)a | BI ≤ 60 |  | 109 (19) | 94 (29) |  | Infection | Until 3 months from ictus |
| Maier IL (2018) [43] | Observational | Ischemic stroke | 158 (38) | 148 (26) | 0.59 (0.16-2.17)a | In-hospital |  |  |  |  |  | 158 (44) | 148 (40) | 0.78 (0.31-1.92)e | Pneumonia | In-hospital |
| Sykora M (2018) [44] | Observational, retrospective | Haemorrhagic stroke | 279 (111) | 706 (206) | 1.2 (0.8-1.7)a | 3-months from ictus |  |  |  |  |  |  |  |  |  |  |
| N number, OR odds ratio, RR rate ratio, a – adjusted for age and stroke severity, b – adjusted for age, c – adjusted for stroke severity, d – unadjusted, e – adjusted for confounders, RCT randomised clinical trial, mRS modified Rankin scale, BI Barthel Index | | | | | | | | | | | | | | | | |

| TABLE S6**.** Quality assessment | | | | | | | |
| --- | --- | --- | --- | --- | --- | --- | --- |
| SBU´s checklist for observational studies[26] | Selection bias | Treatment bias | Assessment bias | Fall-out bias | Reporting bias | Conflict of interest bias | Risk of bias |
| Dziedzik T (2007) [30] | Low risk | Low risk | Low risk | Not applicable | Moderate risk | Low risk | Low risk |
| Dowlatshahi D (2009) [32] | Moderate risk | Moderate risk | Moderate risk | Not applicable | Low risk | Low risk | Moderate risk |
| Fuentes B (2010) [45] | Moderate risk | Moderate risk | Moderate risk | Not applicable | Low risk | Low risk | Moderate risk |
| De Raedt S (2012) [46] | Moderate risk | Moderate risk | Moderate risk | Not applicable | Low risk | Low risk | Moderate risk |
| Kalita J (2013) [34] | Moderate risk | Low risk | Moderate risk | Not applicable | Moderate risk | Low risk | Moderate risk |
| Shoup JP (2014) [35] | Low risk | Low risk | Low risk | Not applicable | Low risk | Low risk | Low risk |
| Maier IL (2015) [36] | Low risk | Low risk | Low risk | Not applicable | Low risk | Low risk | Low risk |
| Phelan C (2015) [37] | Low risk | Low risk | Low risk | Not applicable | Low risk | Low risk | Low risk |
| Sundbøll J (2015) [29] | Low risk | Low risk | Low risk | Low risk | Low risk | Low risk | Low risk |
| Sykora M (2015) [38] | Low risk | Low risk | Low risk | Low risk | Low risk | Low risk | Low risk |
| Tziomalos K (2015) [39] | Low risk | Moderate risk | Low risk | Not applicable | Low risk | Low risk | Moderate risk |
| Westendorp WF (2016) [40] | Low risk | Low risk | Low risk | Low risk | Low risk | Low risk | Low risk |
| Koton S (2017) [27] | Low risk | Low risk | Low risk | Moderate risk | Low risk | Low risk | Moderate risk |
| Starr JB (2017a) [41] | Low risk | Low risk | Low risk | Low risk | Low risk | Low risk | Low risk |
| Starr JB (2017b) [42] | Low risk | Low risk | Low risk | Not applicable | Low risk | Low risk | Low risk |
| Eizenberg Y (2018) [28] | Low risk | Low risk | Low risk | Moderate risk | Low risk | Low risk | Moderate risk |
| Maier IL (2018) [43] | Low risk | Moderate risk | Low risk | Not applicable | Low risk | Low risk | Moderate risk |
| Sykora M (2018) [44] | Low risk | Moderate risk | Low risk | Not applicable | Low risk | Low risk | Low risk |
| SBU´s checklist for observational studies [26] | | | | | | | |
| Barer DH (1988) [31] | Moderate risk | Low risk | Low risk | Moderate risk | Low risk | Low risk | Moderate risk |
| Potter J (2009) [33] | Low risk | Low risk | Low risk | Moderate risk | Low risk | Low risk | Moderate risk |
| SBU - Swedish Agency For Health Technology Assessment And Assessment Of Social Services | | | | | | | |


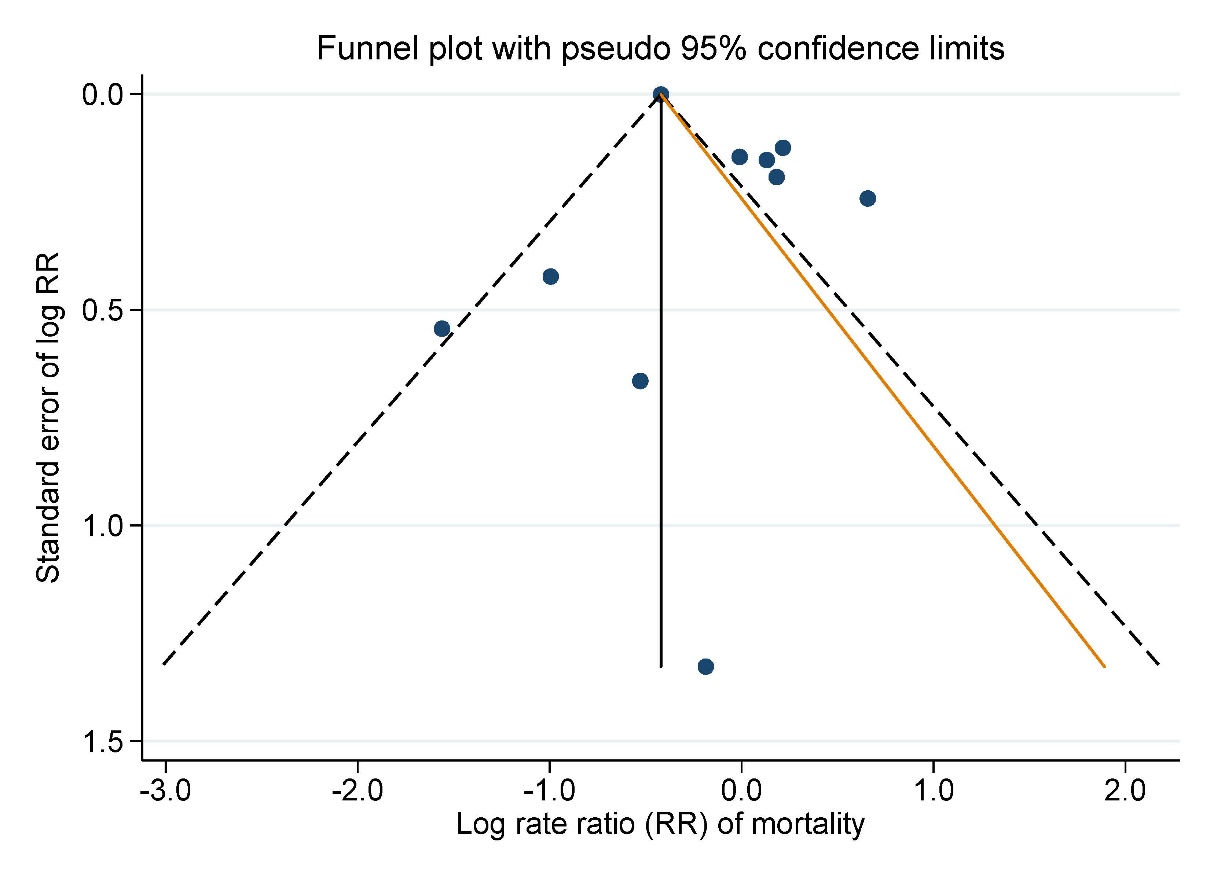


FIGURE S1. Funnel plot visualizing the risk of publication bias among the studies presenting adjusted (for stroke severity and age) rate ratio (RR) for the outcome on mortality.


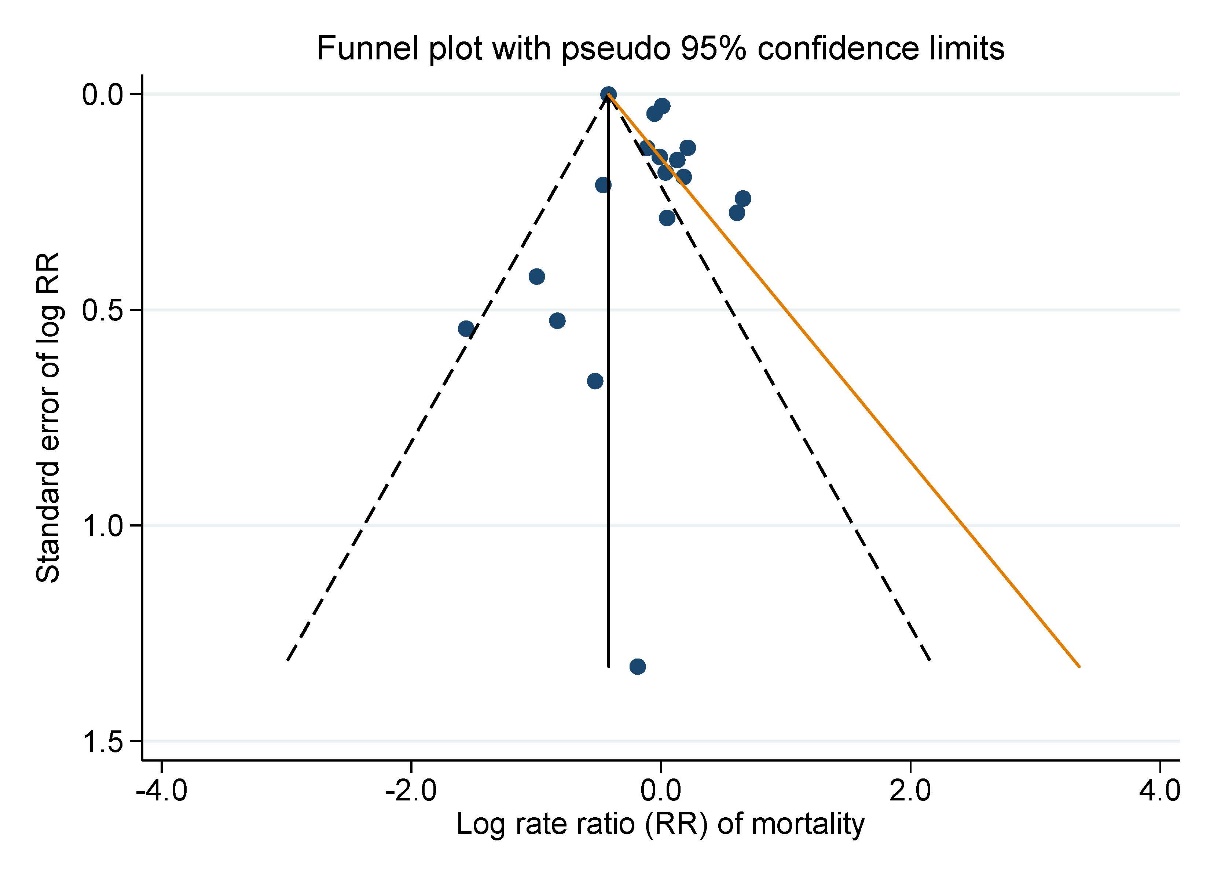


FIGURE S2. Funnel plot visualizing the risk of publication bias among the studies analyzed for the mortality outcome, rate ratio (RR).


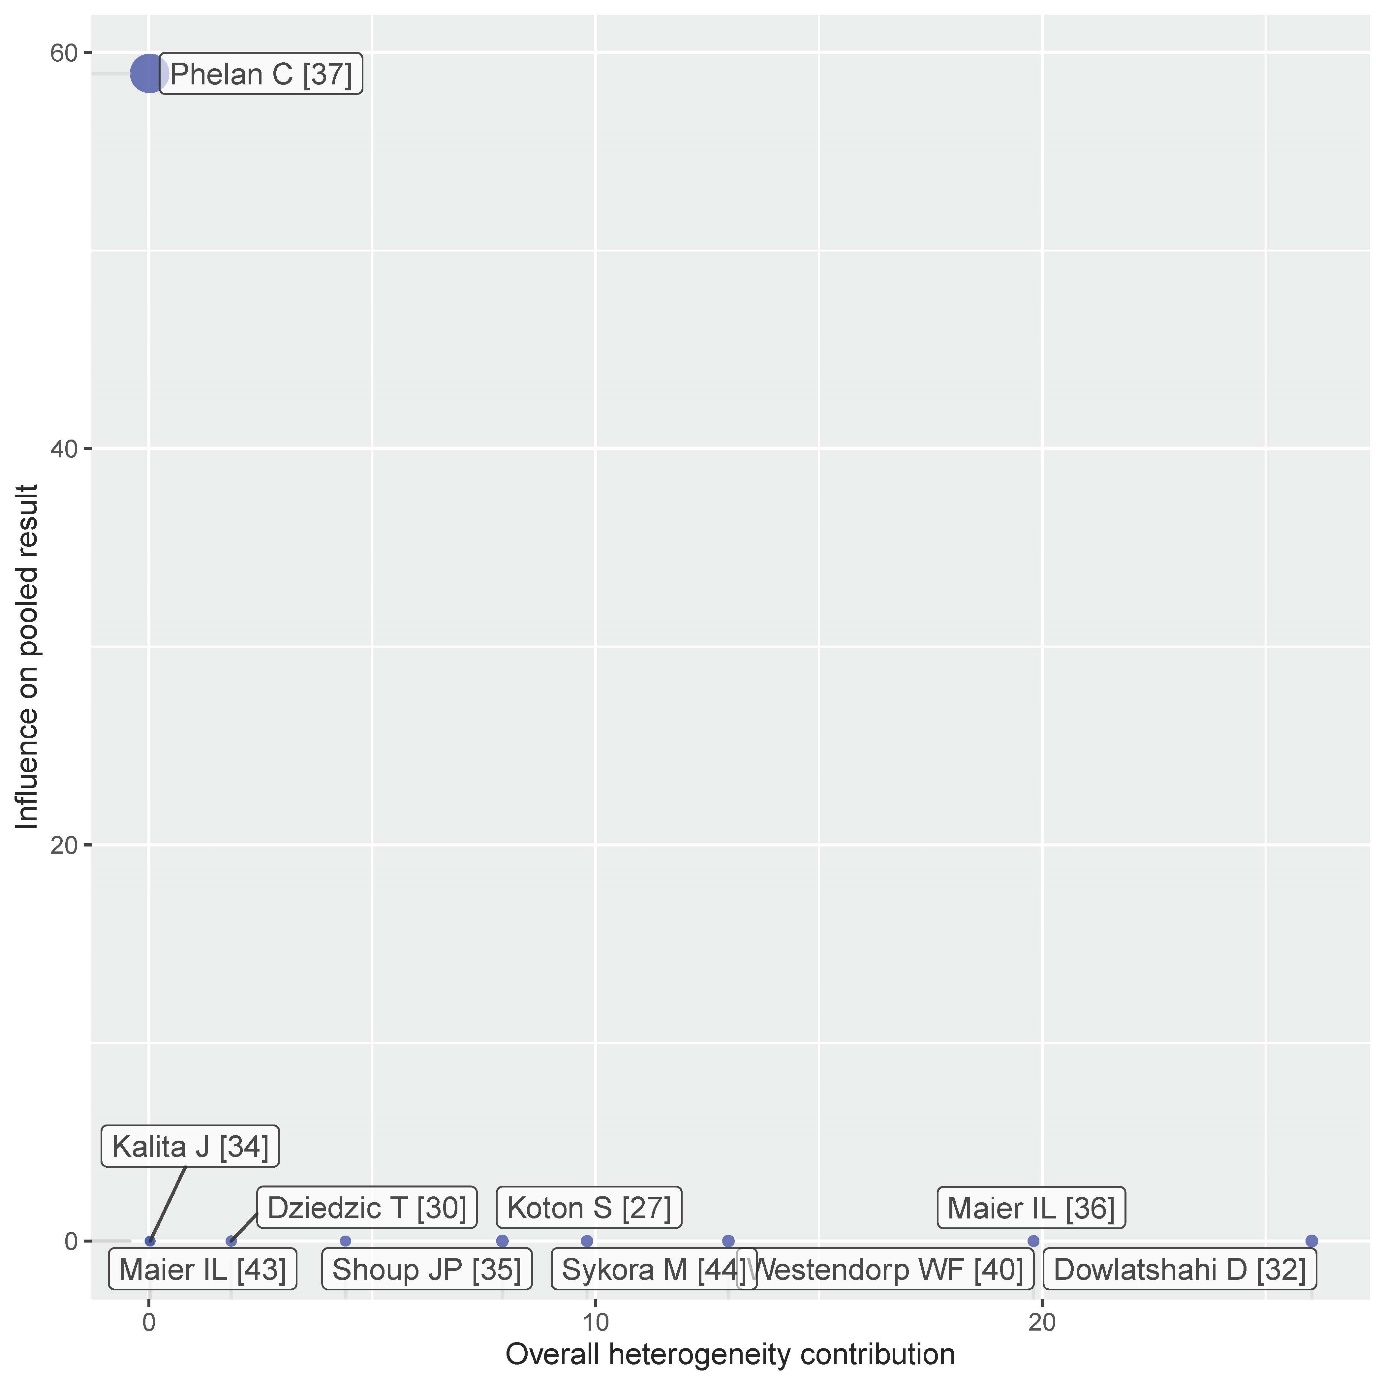


Figure S3. Baujat plot demonstrating the source of heterogeneity among the studies presenting adjusted (for stroke severity and age).


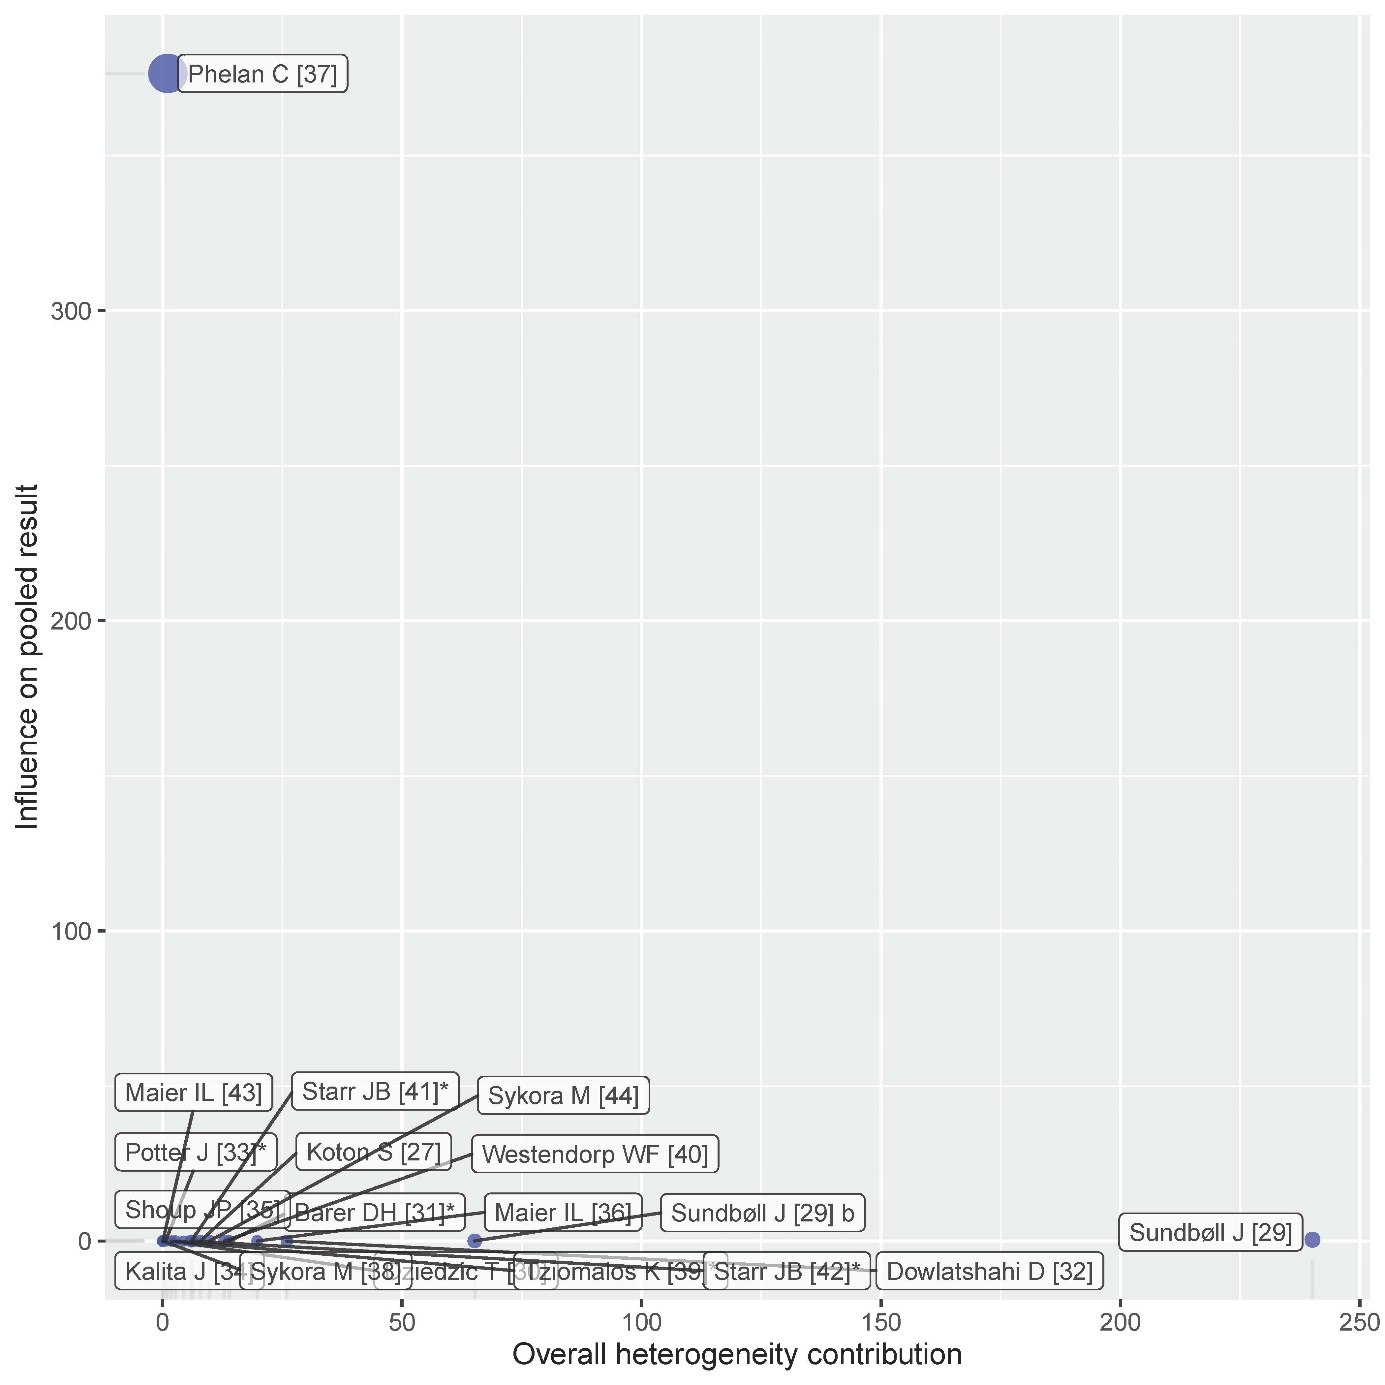


Figure S4. Baujat plot demonstrating the source of heterogeneity among the studies analyzed for the mortality outcome.


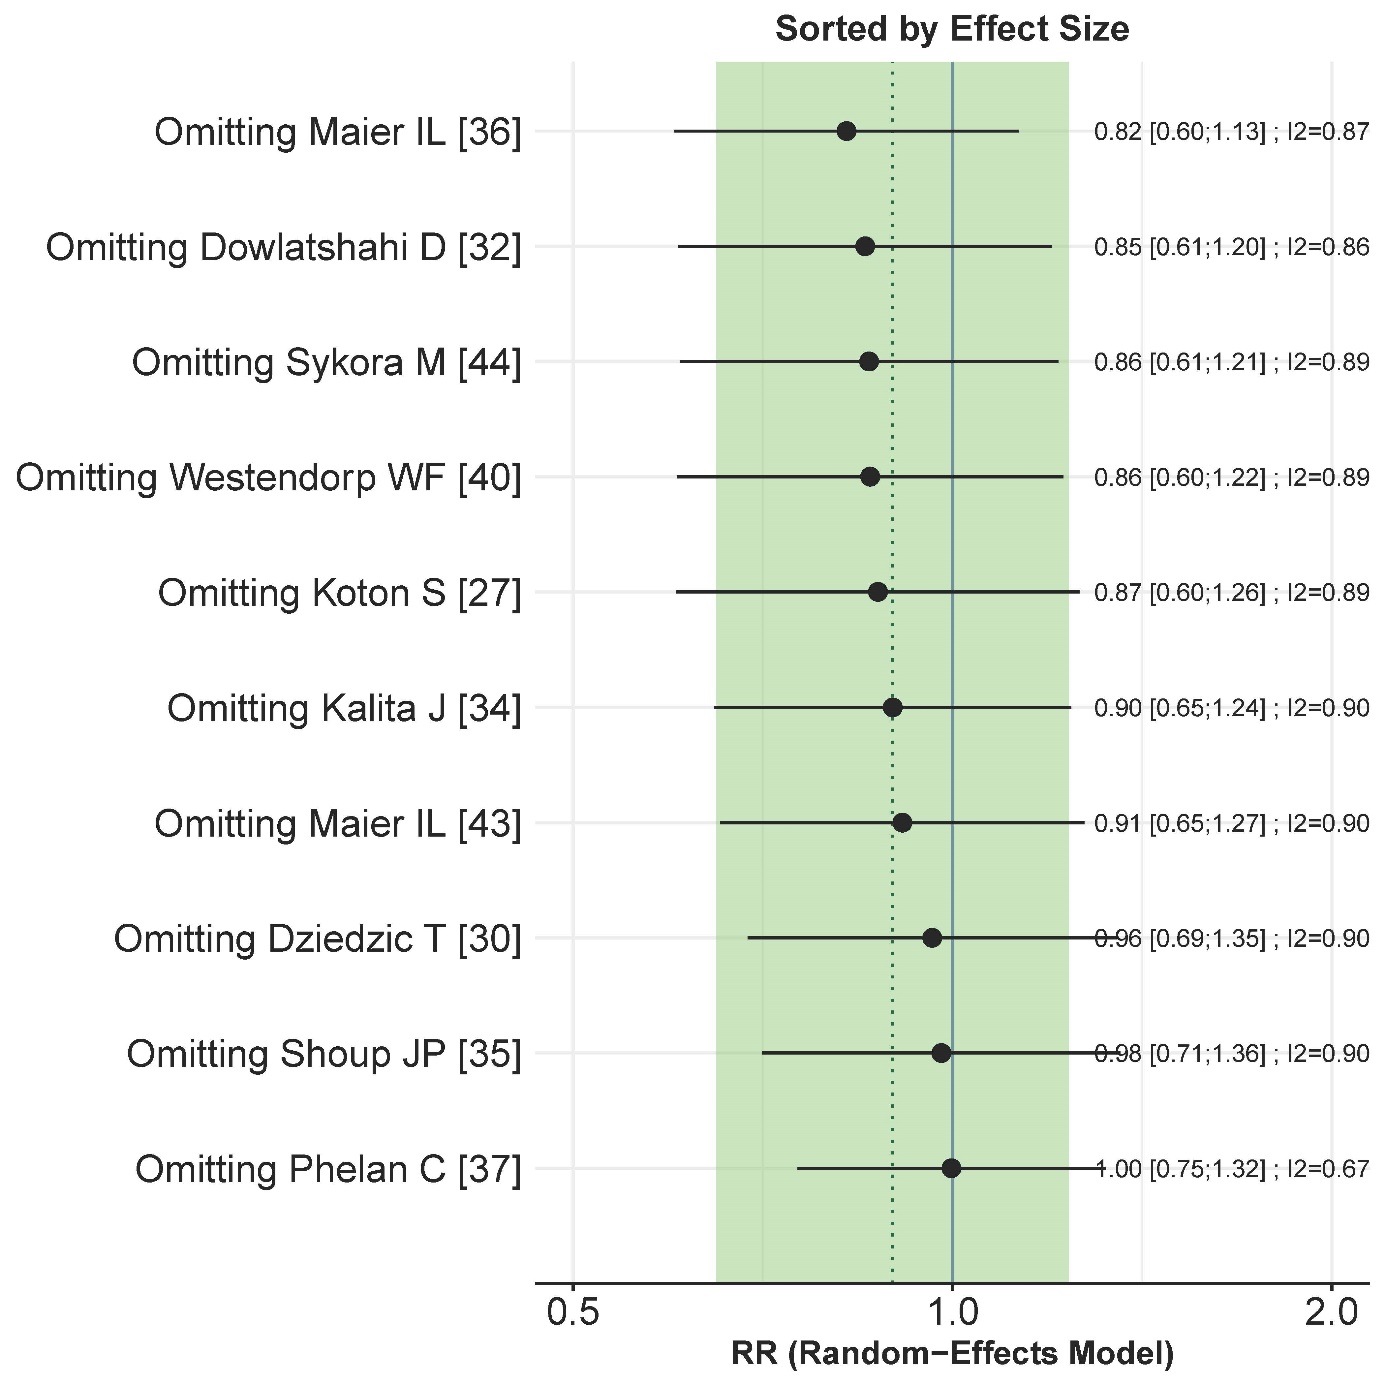


Figure S5. LOO (leave_one_out) method for sensitivity analysis for the studies presenting adjusted (for stroke severity and age) rate ratio (RR) for the outcome on mortality.


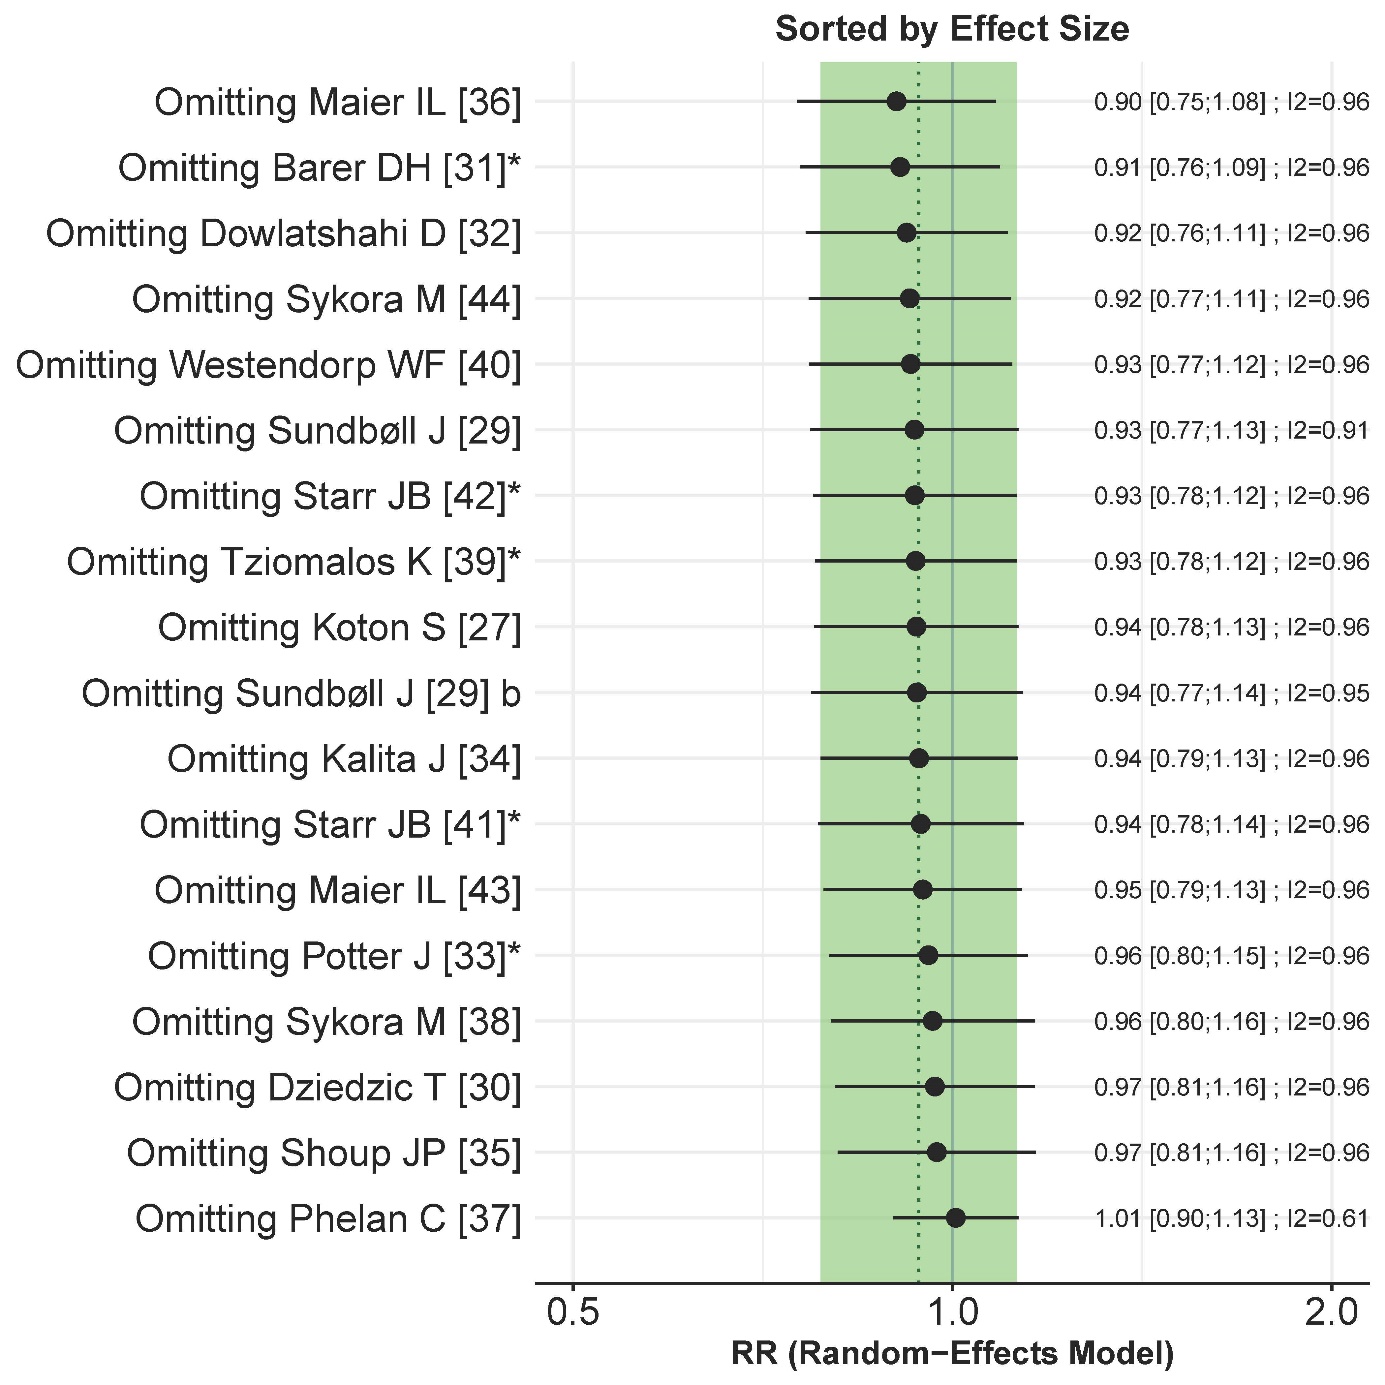


Figure S6. LOO (leave_one_out) method for sensitivity analysis for the studies analyzed for the mortality outcome.


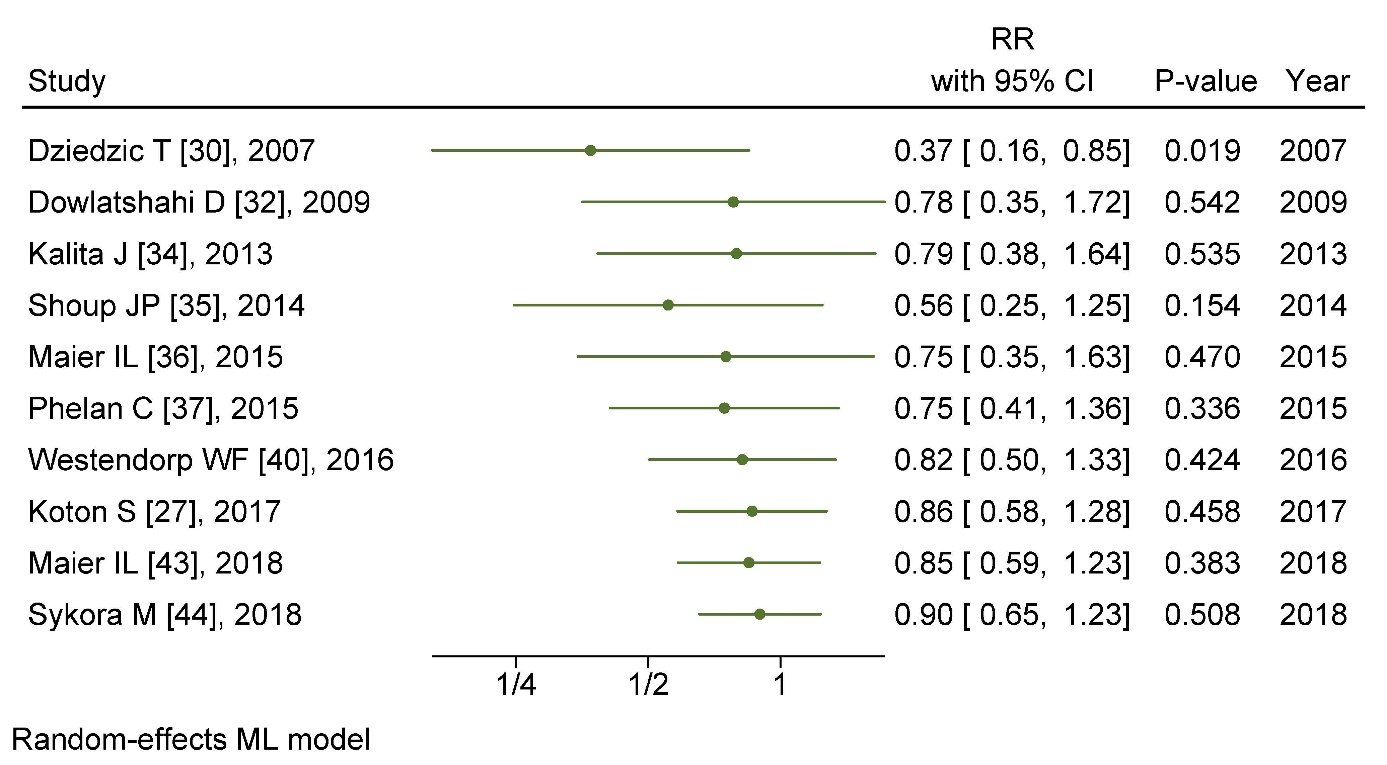


Figure S7. Cumulative meta-analysis for the studies presenting adjusted (for stroke severity and age) rate ratio (RR) for the outcome on mortality


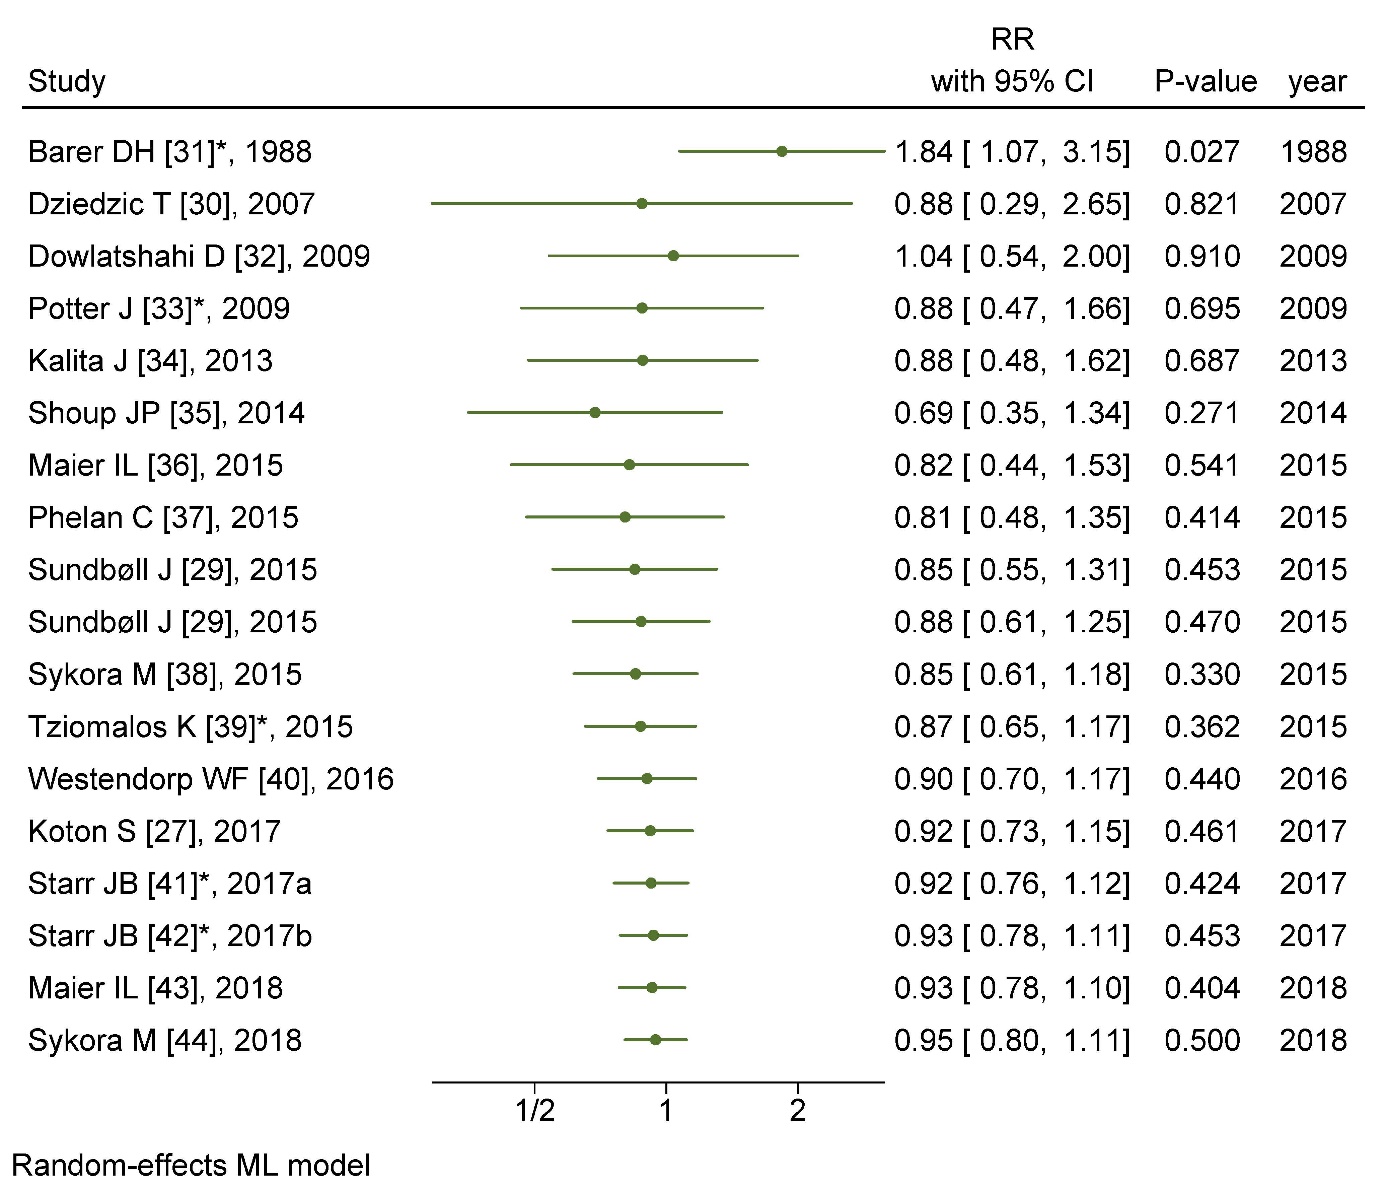


Figure S8. Cumulative meta-analysis for the studies analyzed for the mortality outcome, rate ratio (RR)


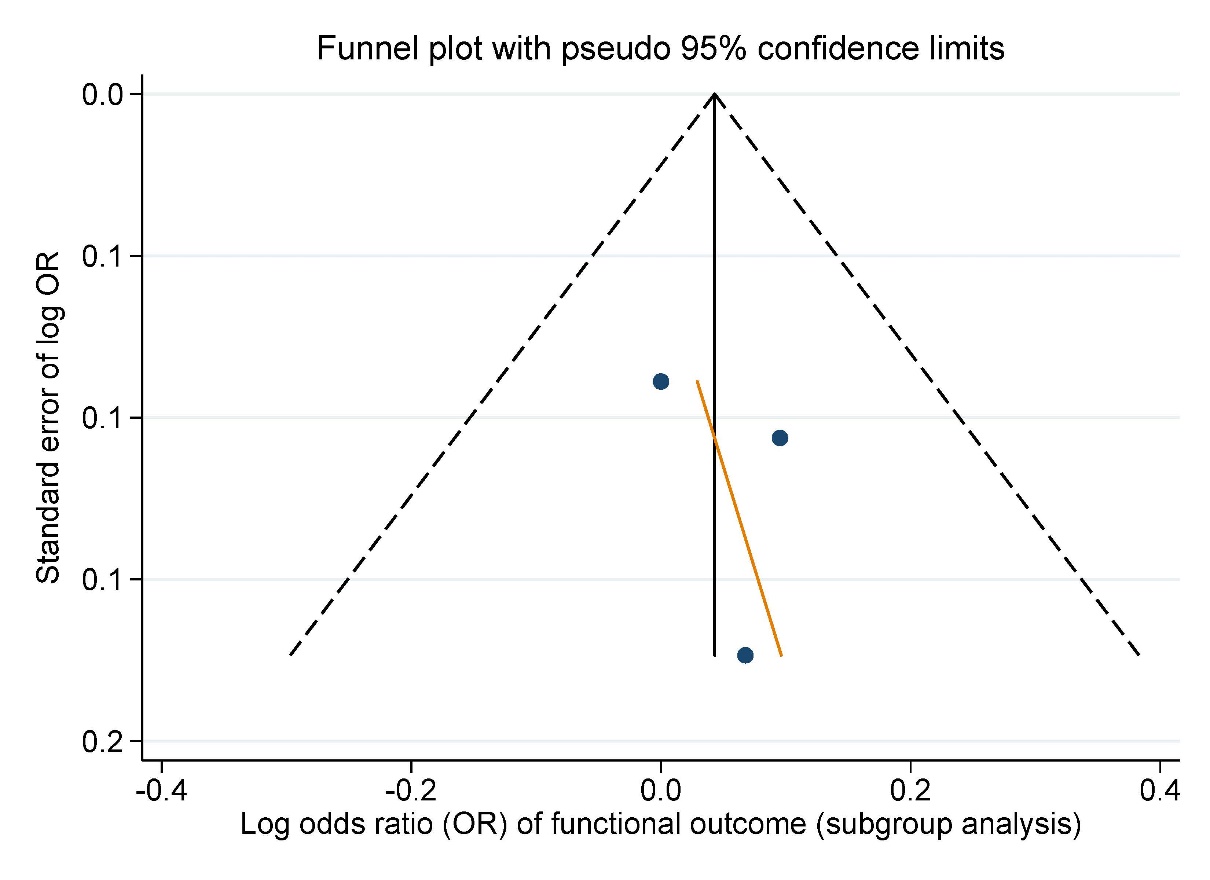


FIGURE S9.Funnel plot visualizing the risk of publication bias among the studies presenting adjusted (for stroke severity and age) odds ratio (OR) for the outcome functional outcome.


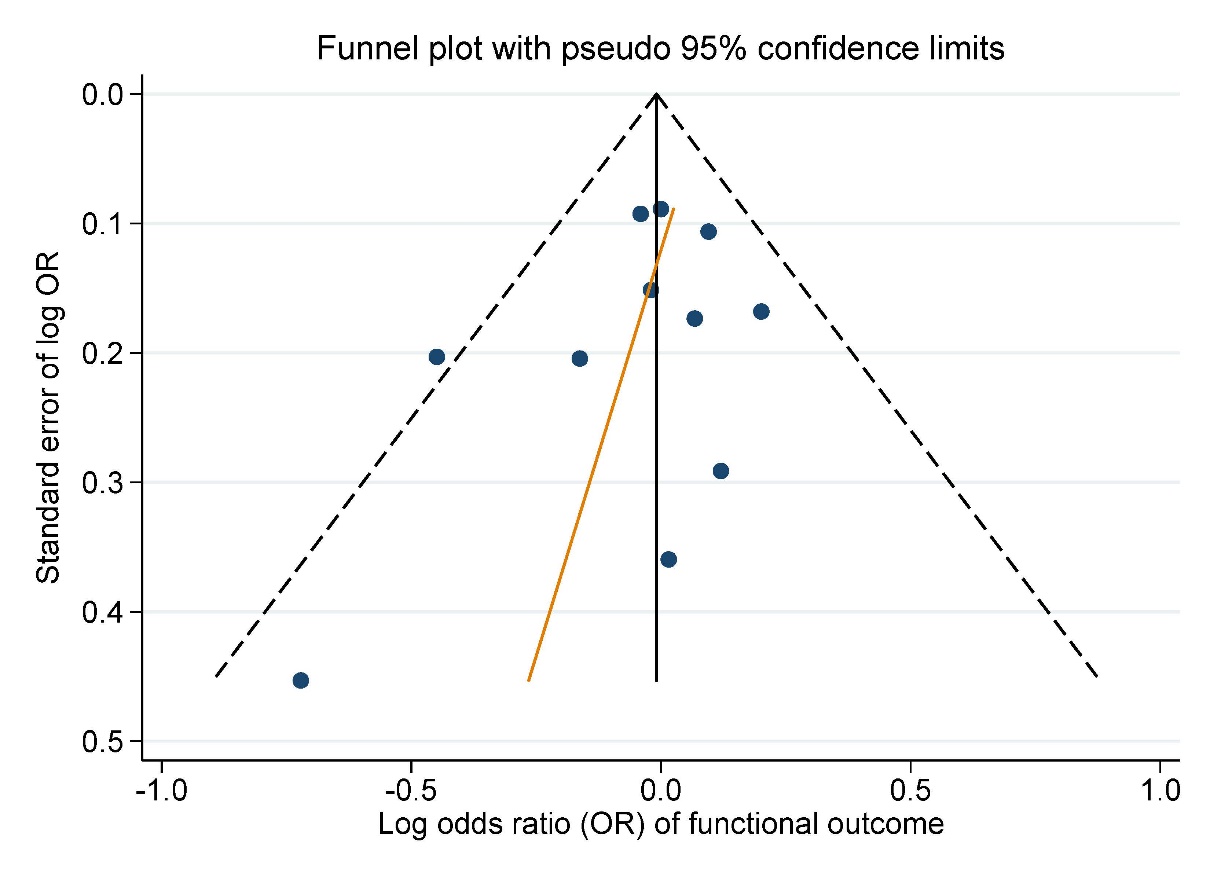


FIGURE S10. Funnel plot visualizing the risk of publication bias among the studies analyzed on functional outcome, odds ratio (OR).


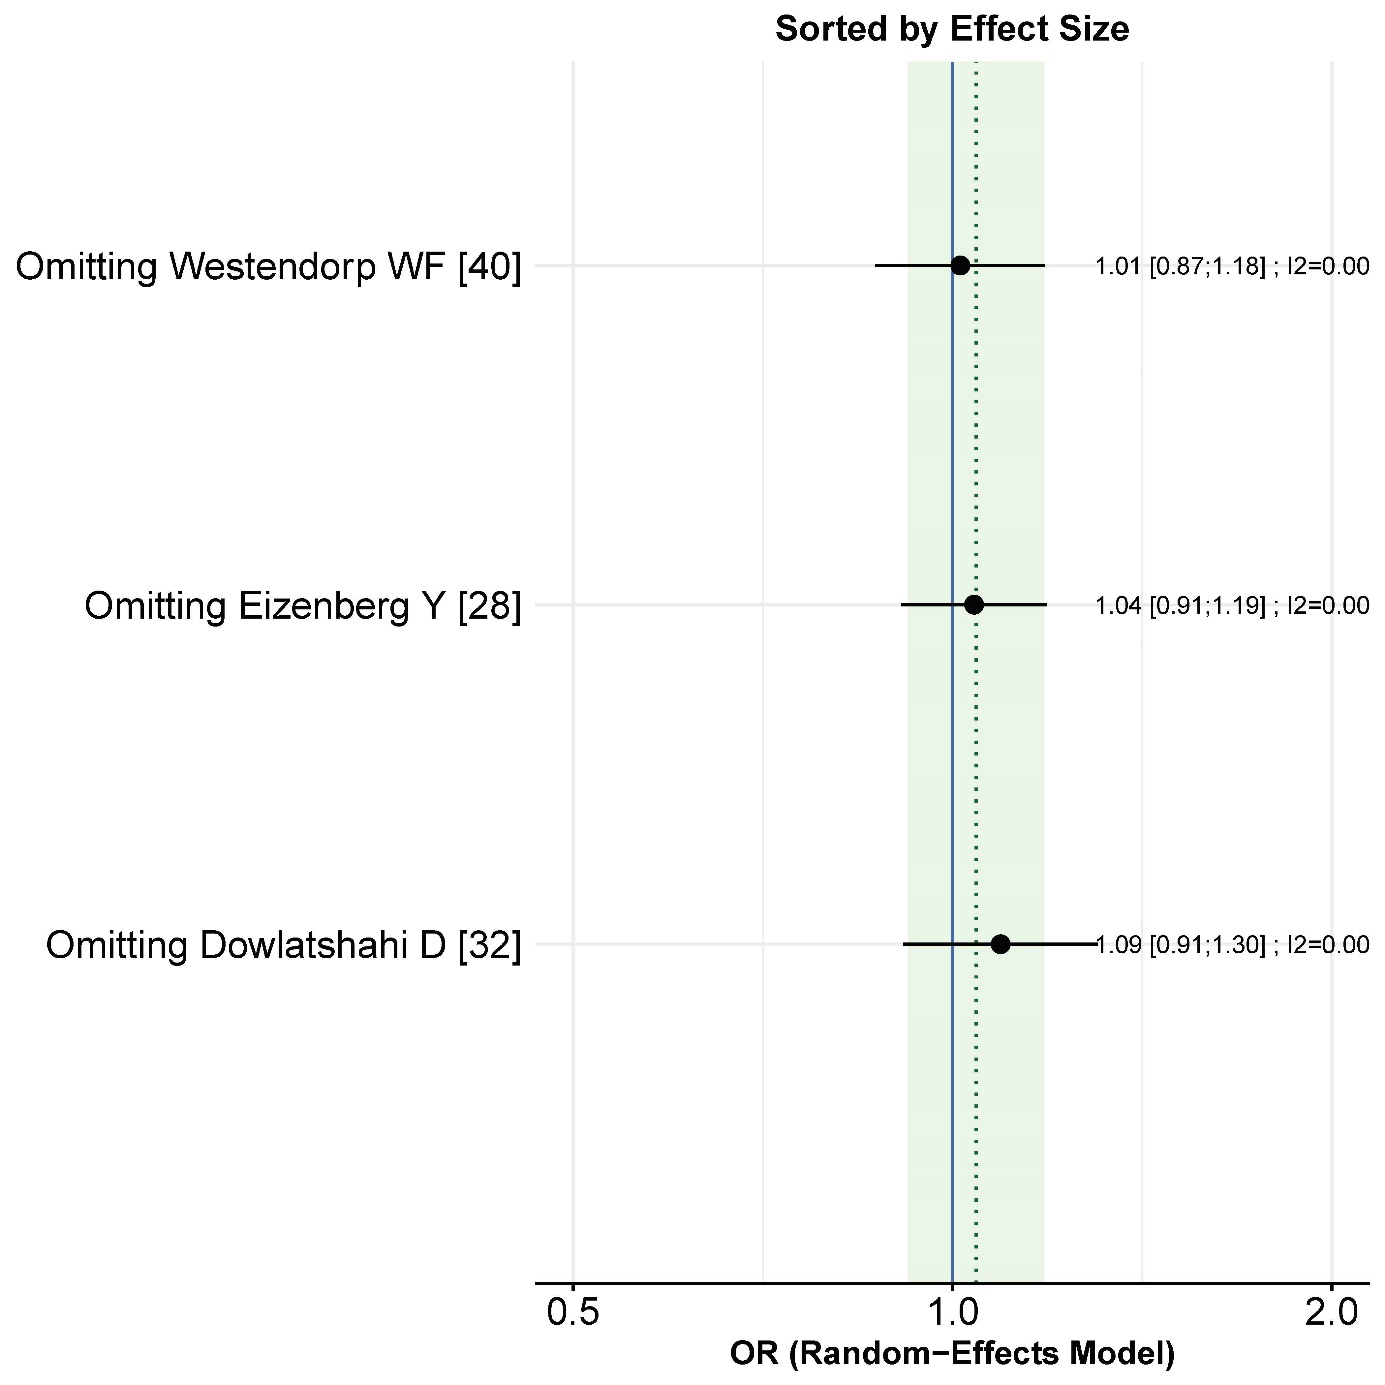


Figure S11. LOO (leave_one_out) method for sensitivity analysis for the studies presenting adjusted (for stroke severity and age) odds ratio (OR) for the outcome functional outcome.


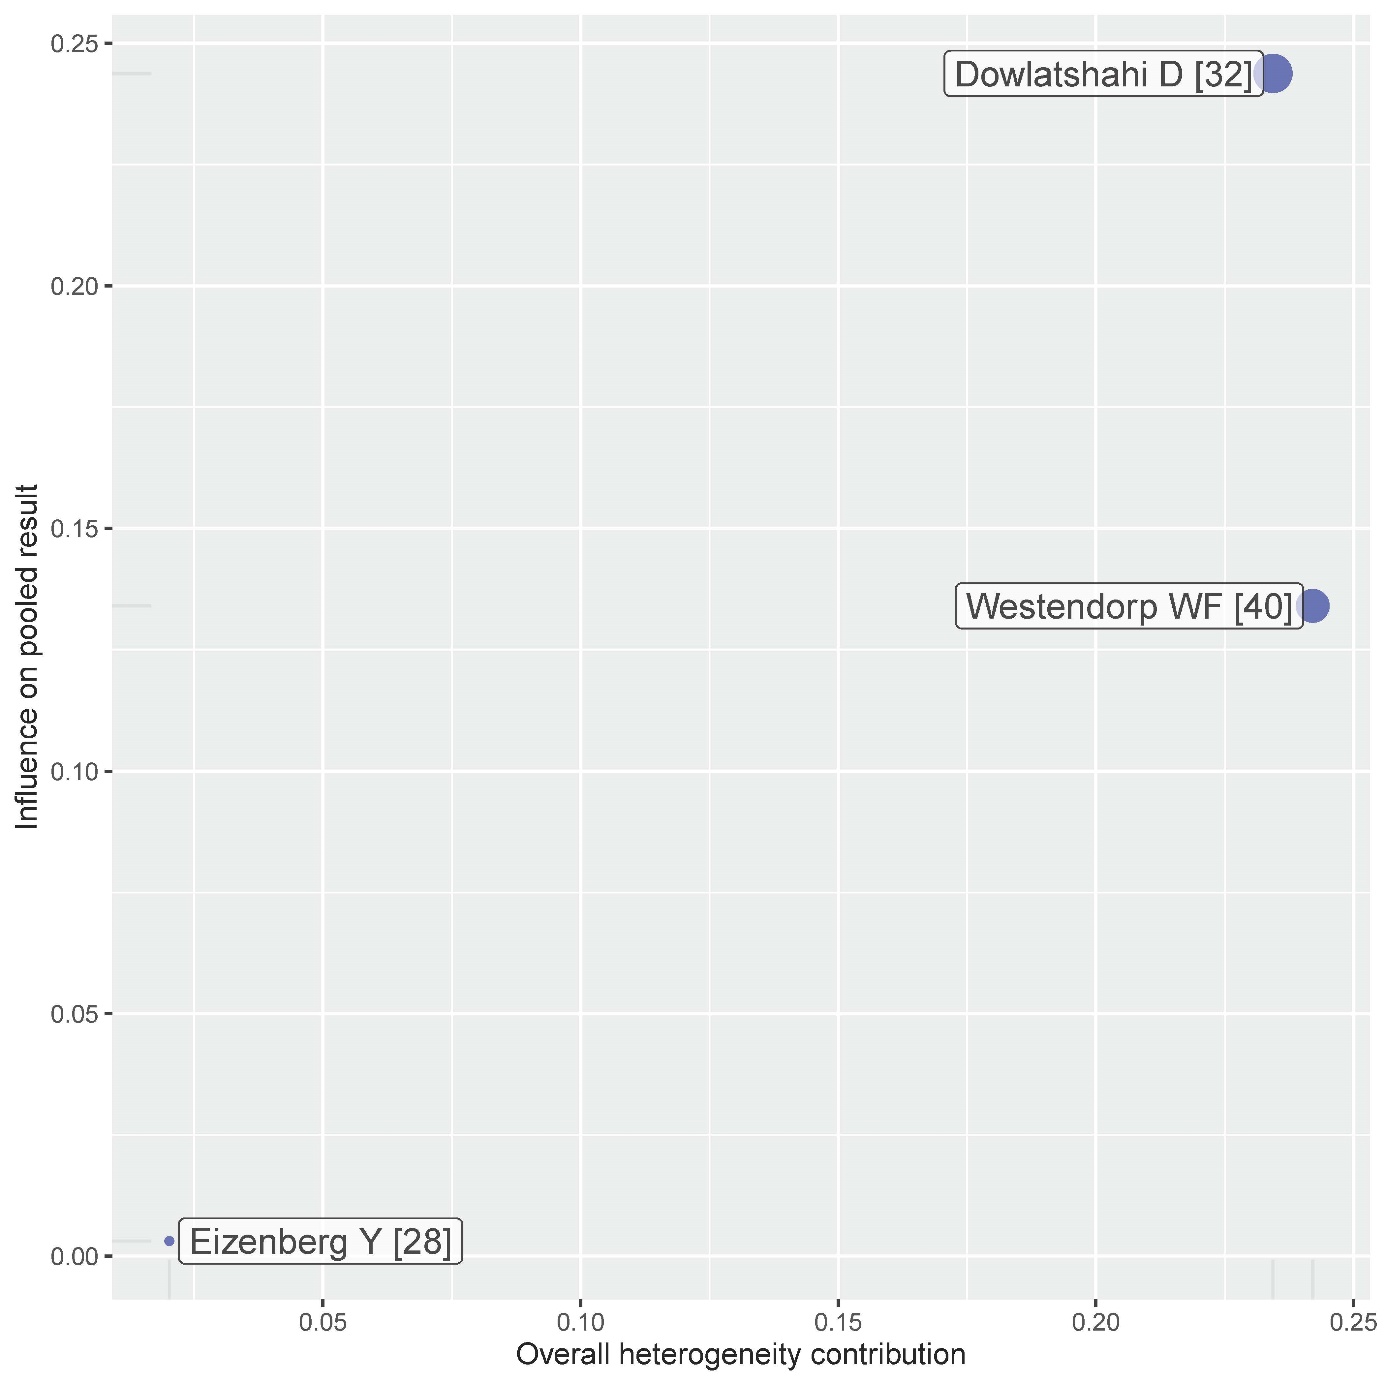


Figure S12. Baujat plot demonstrating the source of heterogeneity for the studies presenting adjusted (for stroke severity and age) odds ratio (OR) for the outcome functional outcome.


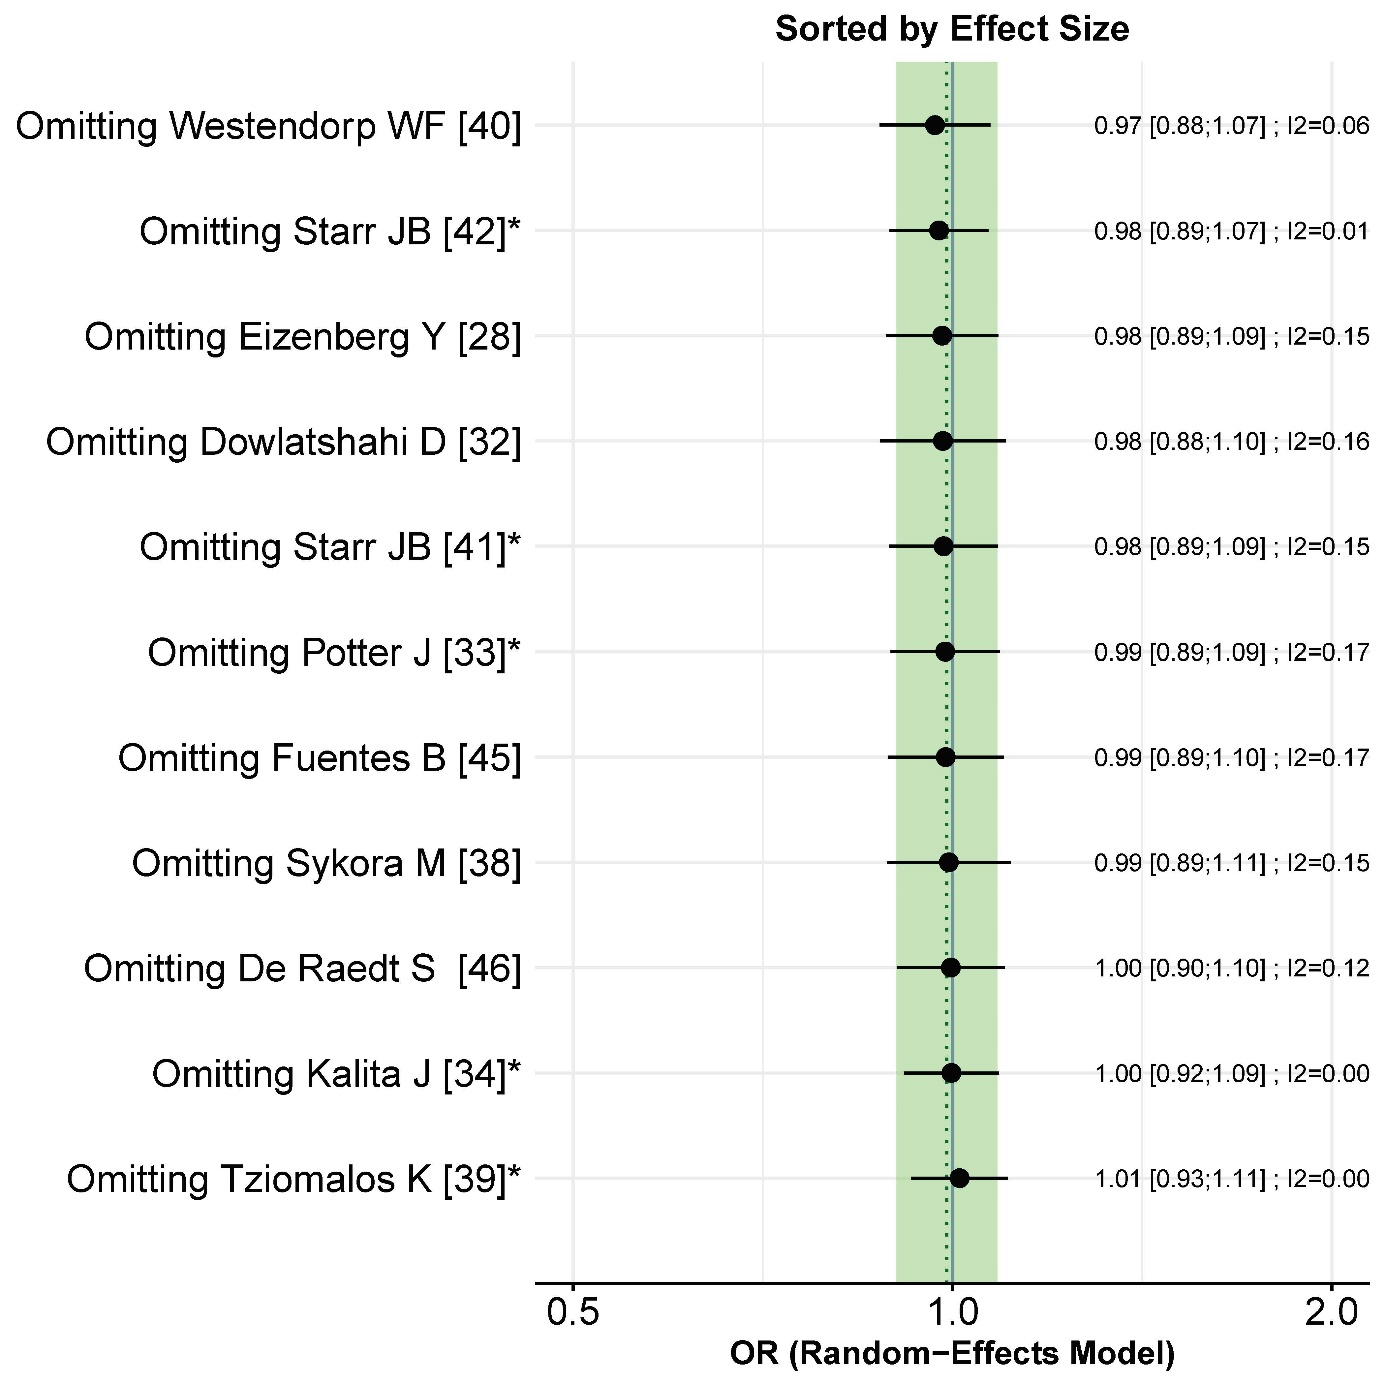
Figure S13. LOO (leave_one_out) method for sensitivity analysis for the studies analyzed on functional outcome, odds ratio (OR).


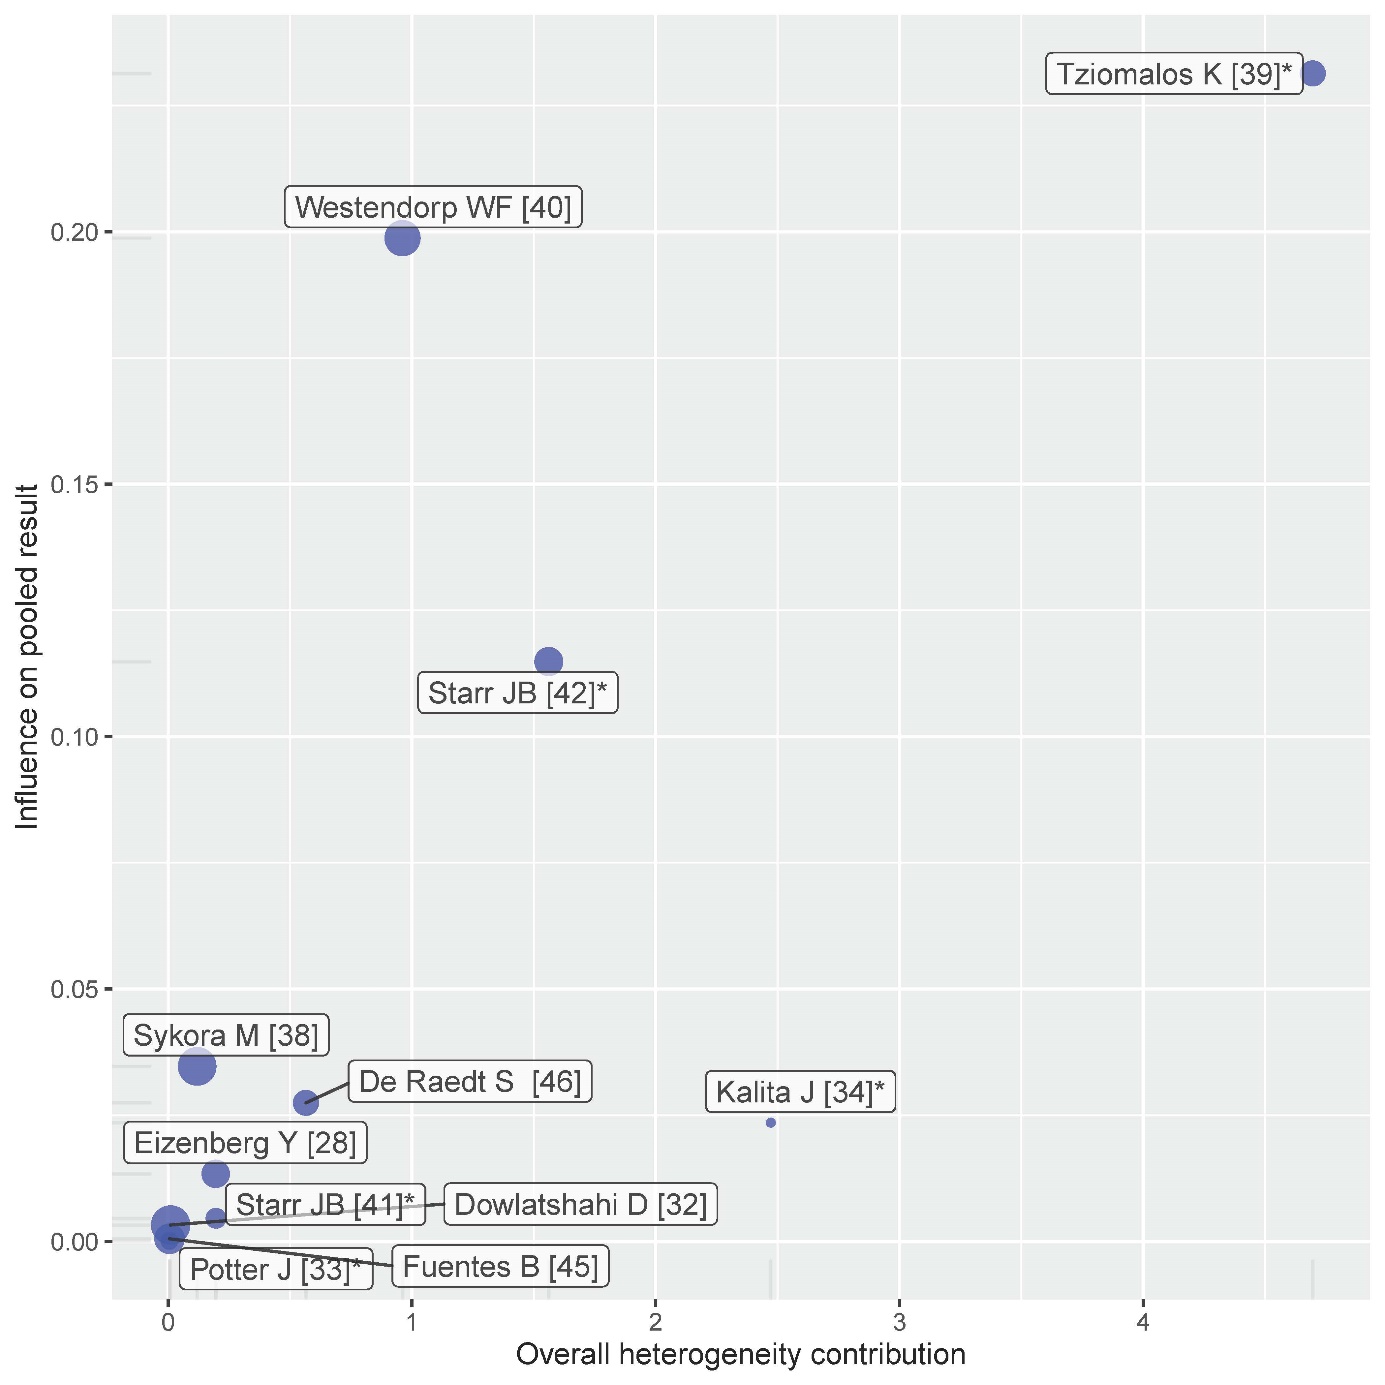


Figure S14. Baujat plot demonstrating the source of heterogeneity for the studies analyzed on functional outcome, odds ratio (OR).


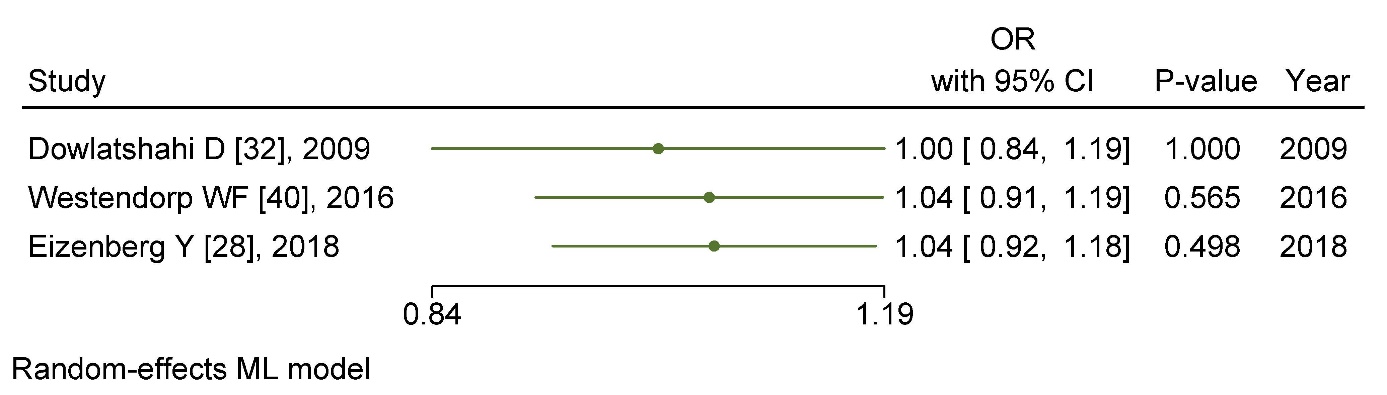


Figure S15. Cumulative meta-analysis for the studies presenting adjusted (for stroke severity and age) odds ratio (OR) for the outcome functional outcome.


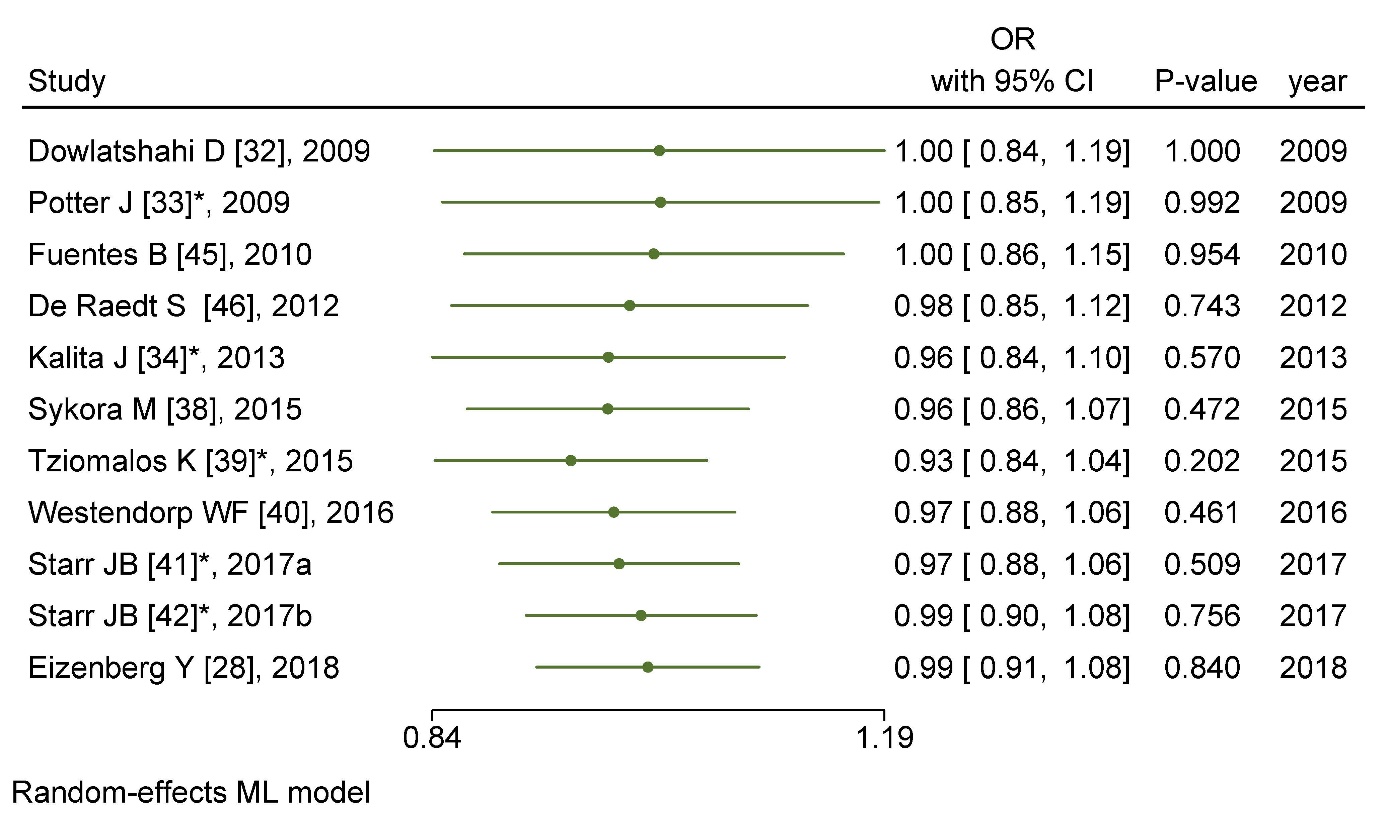


Figure S16. Cumulative meta-analysis for the studies analyzed on functional outcome, odds ratio (OR).


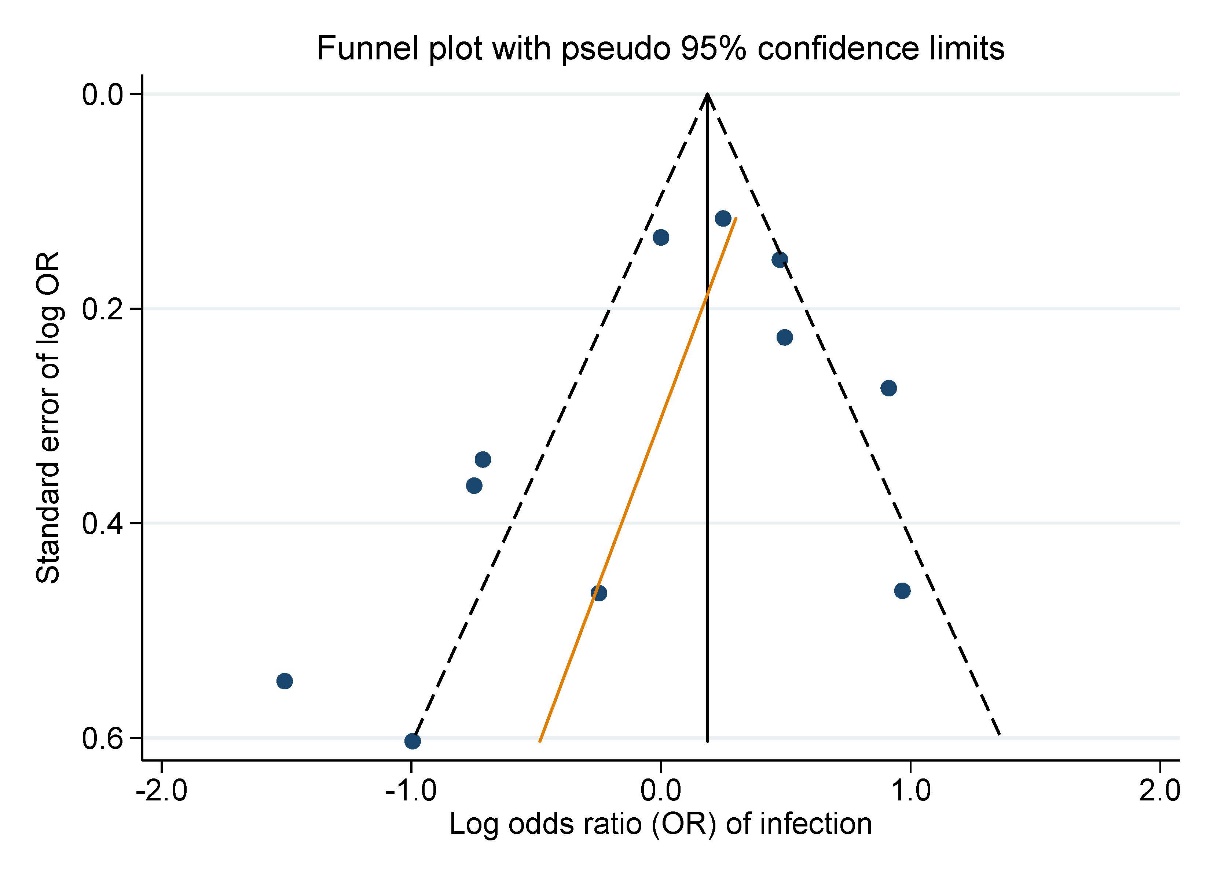


FIGURE S17. Funnel plot visualizing the risk of publication bias among the studies analyzed on the infection outcome, odds ratio (OR).


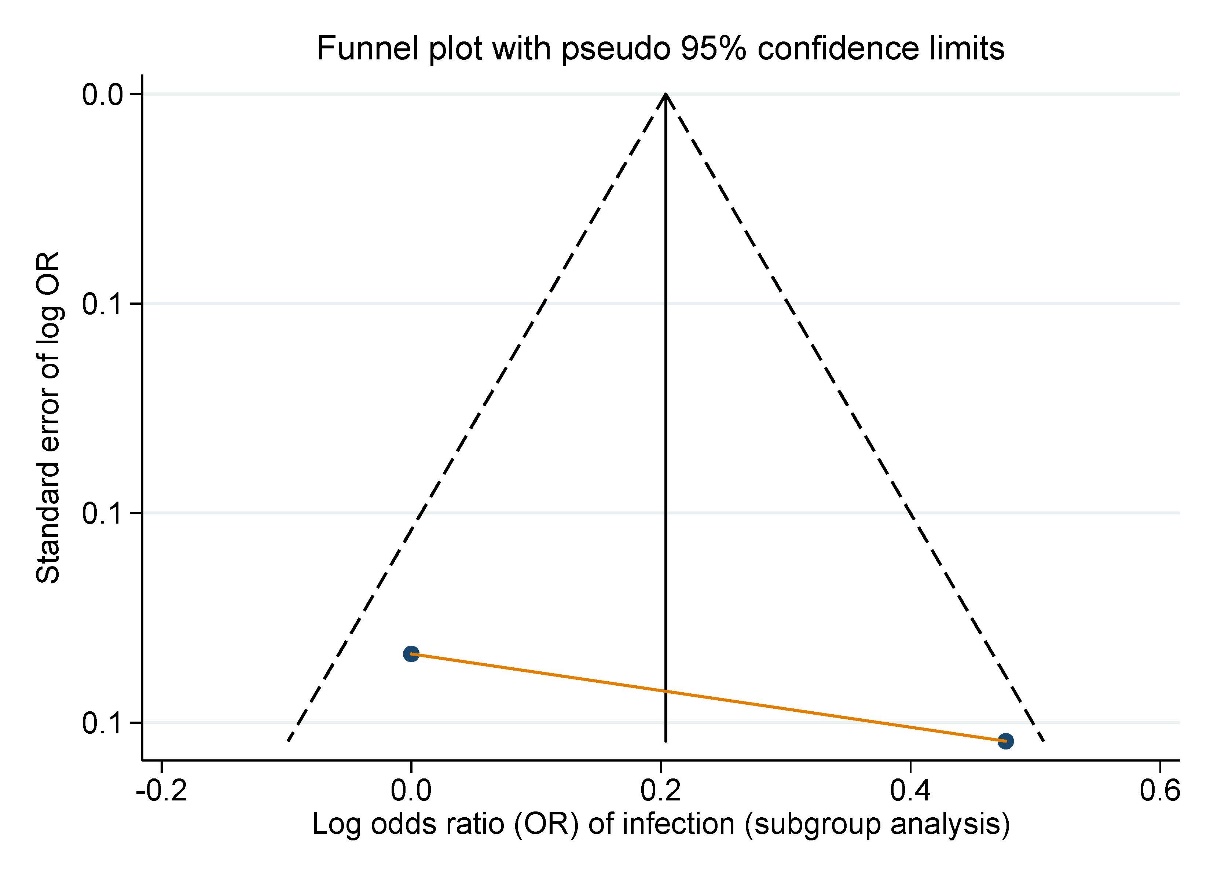


FIGURE S18. Funnel plot visualizing the risk of publication bias among the studies presenting adjusted (for stroke severity and age) odds ratio (OR) for the infection outcome.


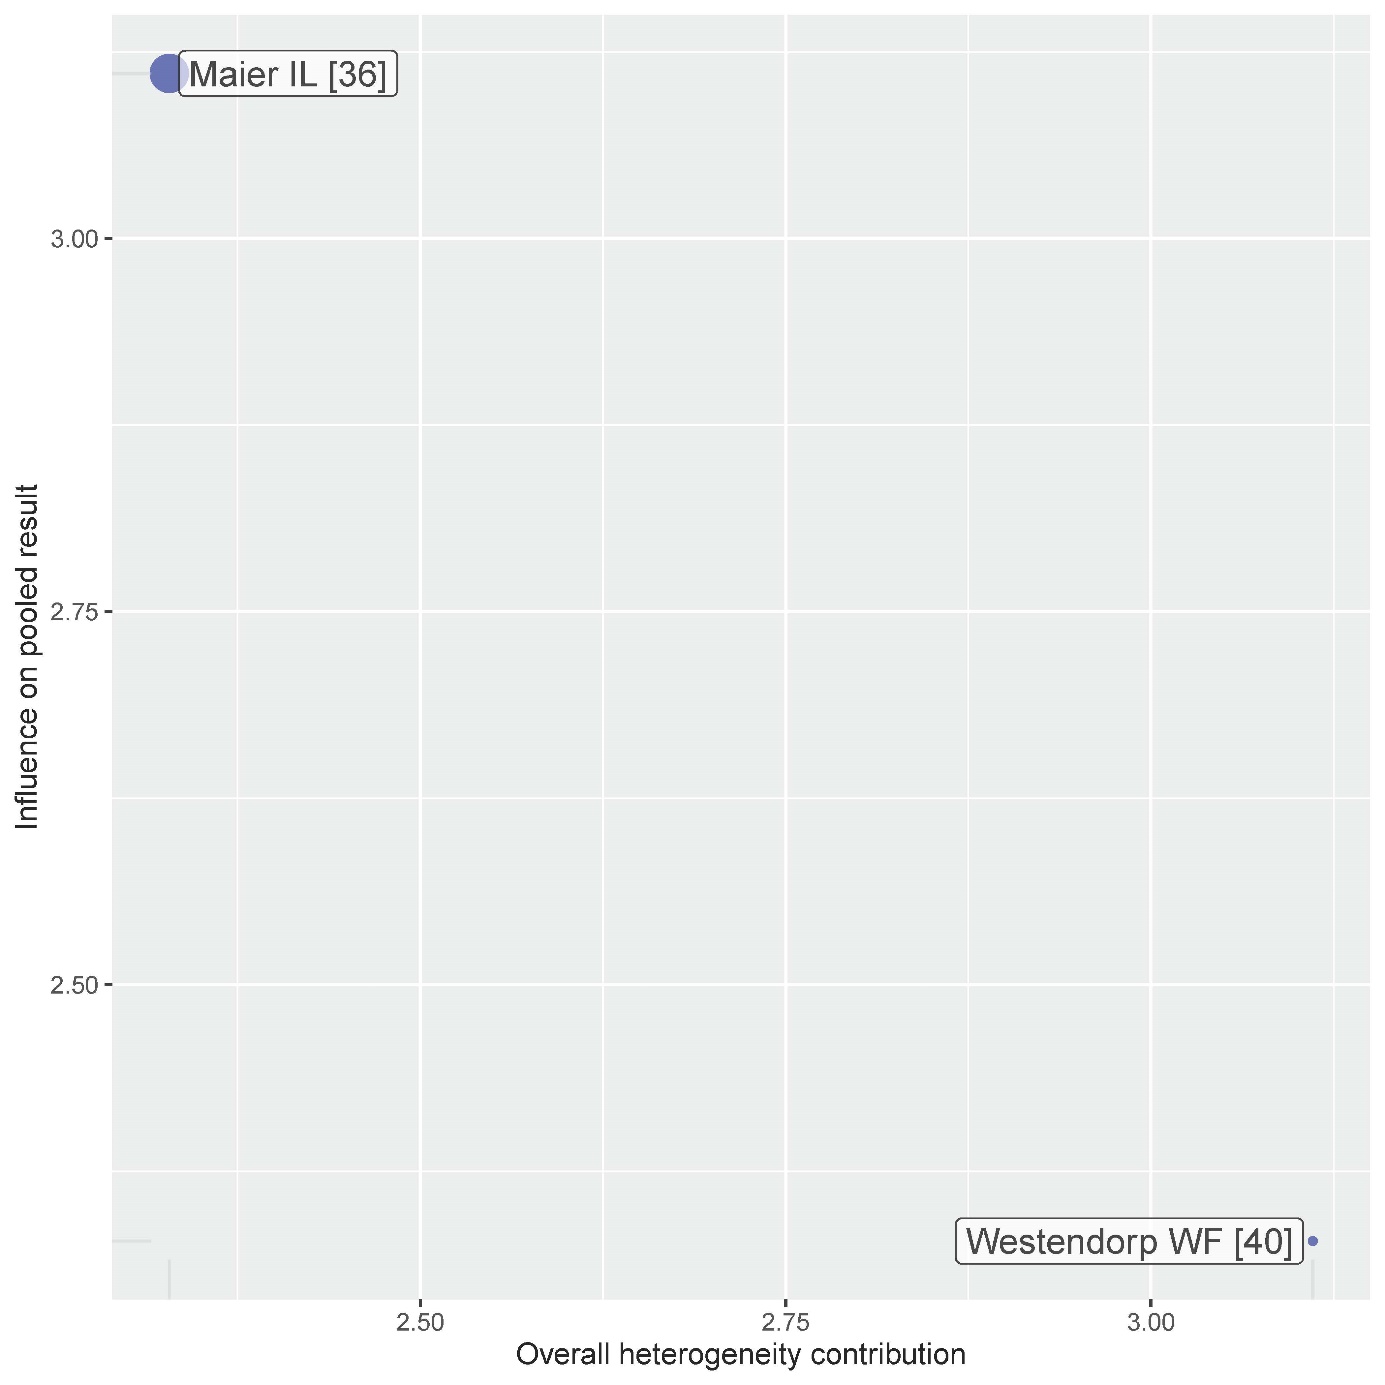


Figure S19. Baujat plot demonstrating the source of heterogeneity for the studies presenting adjusted (for stroke severity and age) odds ratio (OR) for the infection outcome.


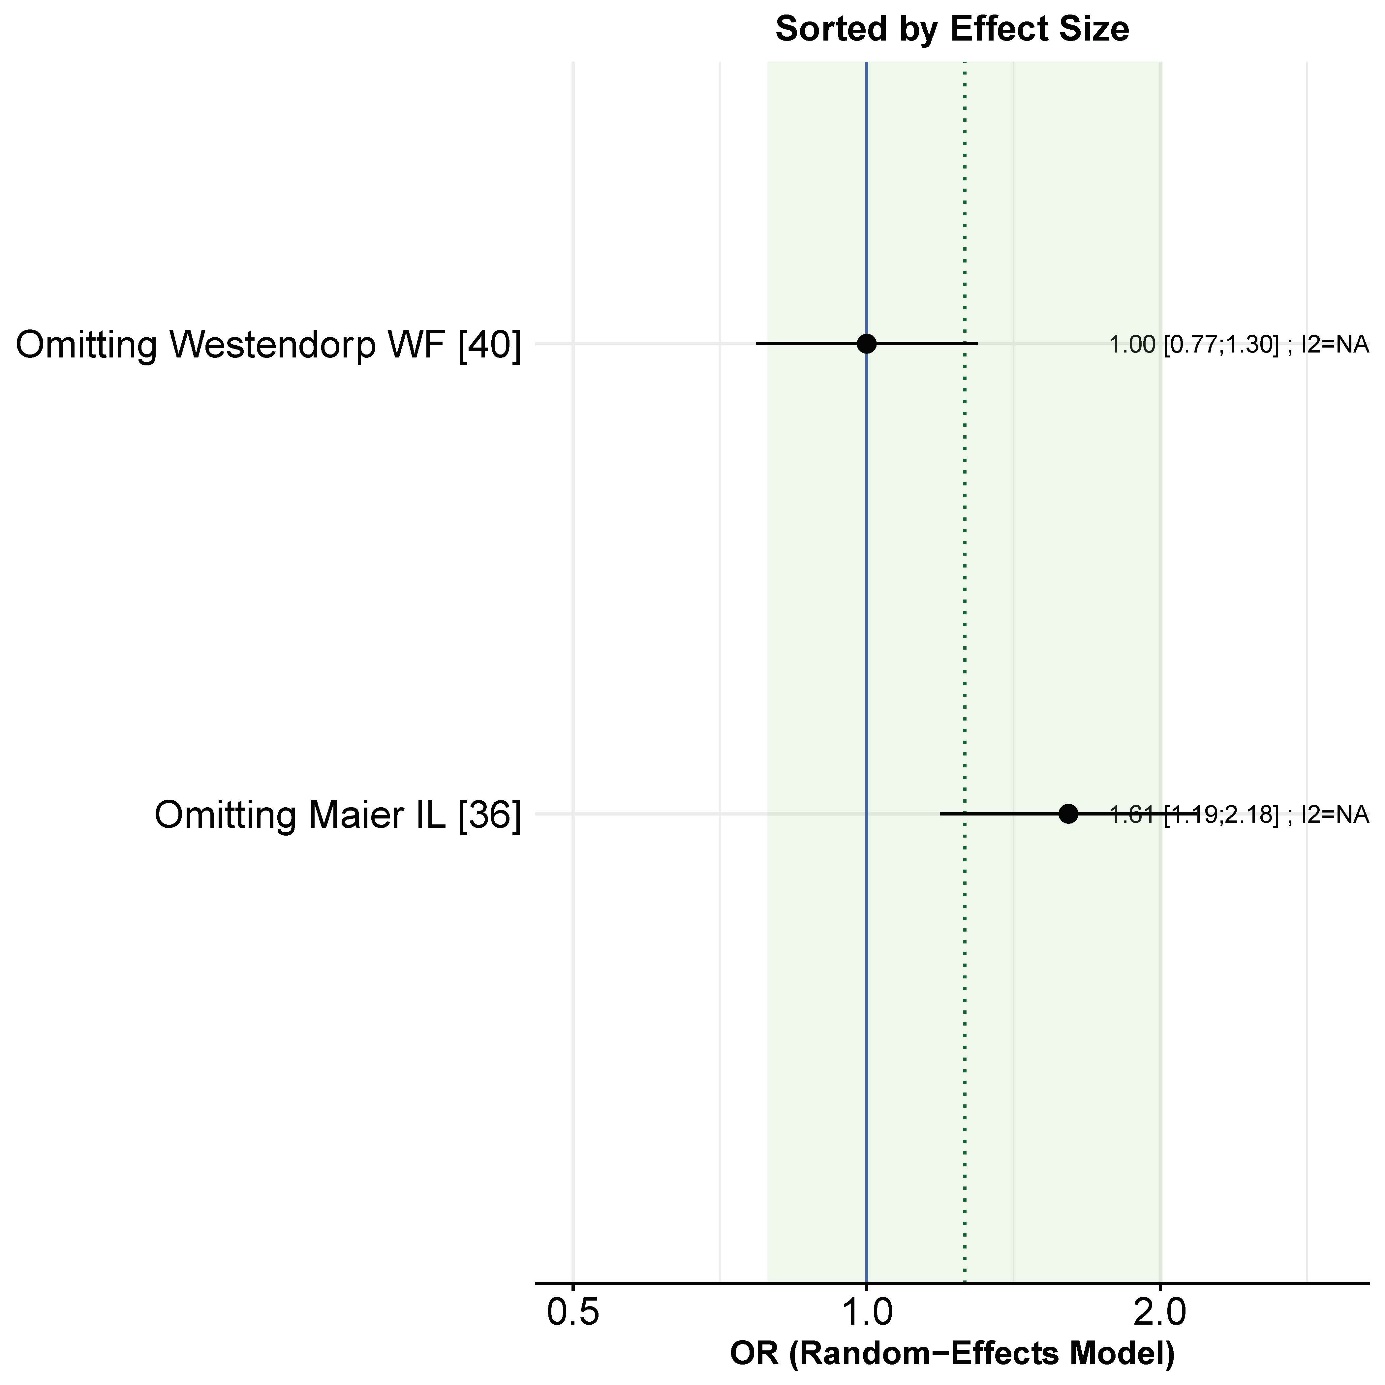


Figure S20. LOO (leave_one_out) method for sensitivity analysis for the studies presenting adjusted (for stroke severity and age) odds ratio (OR) for the infection outcome.


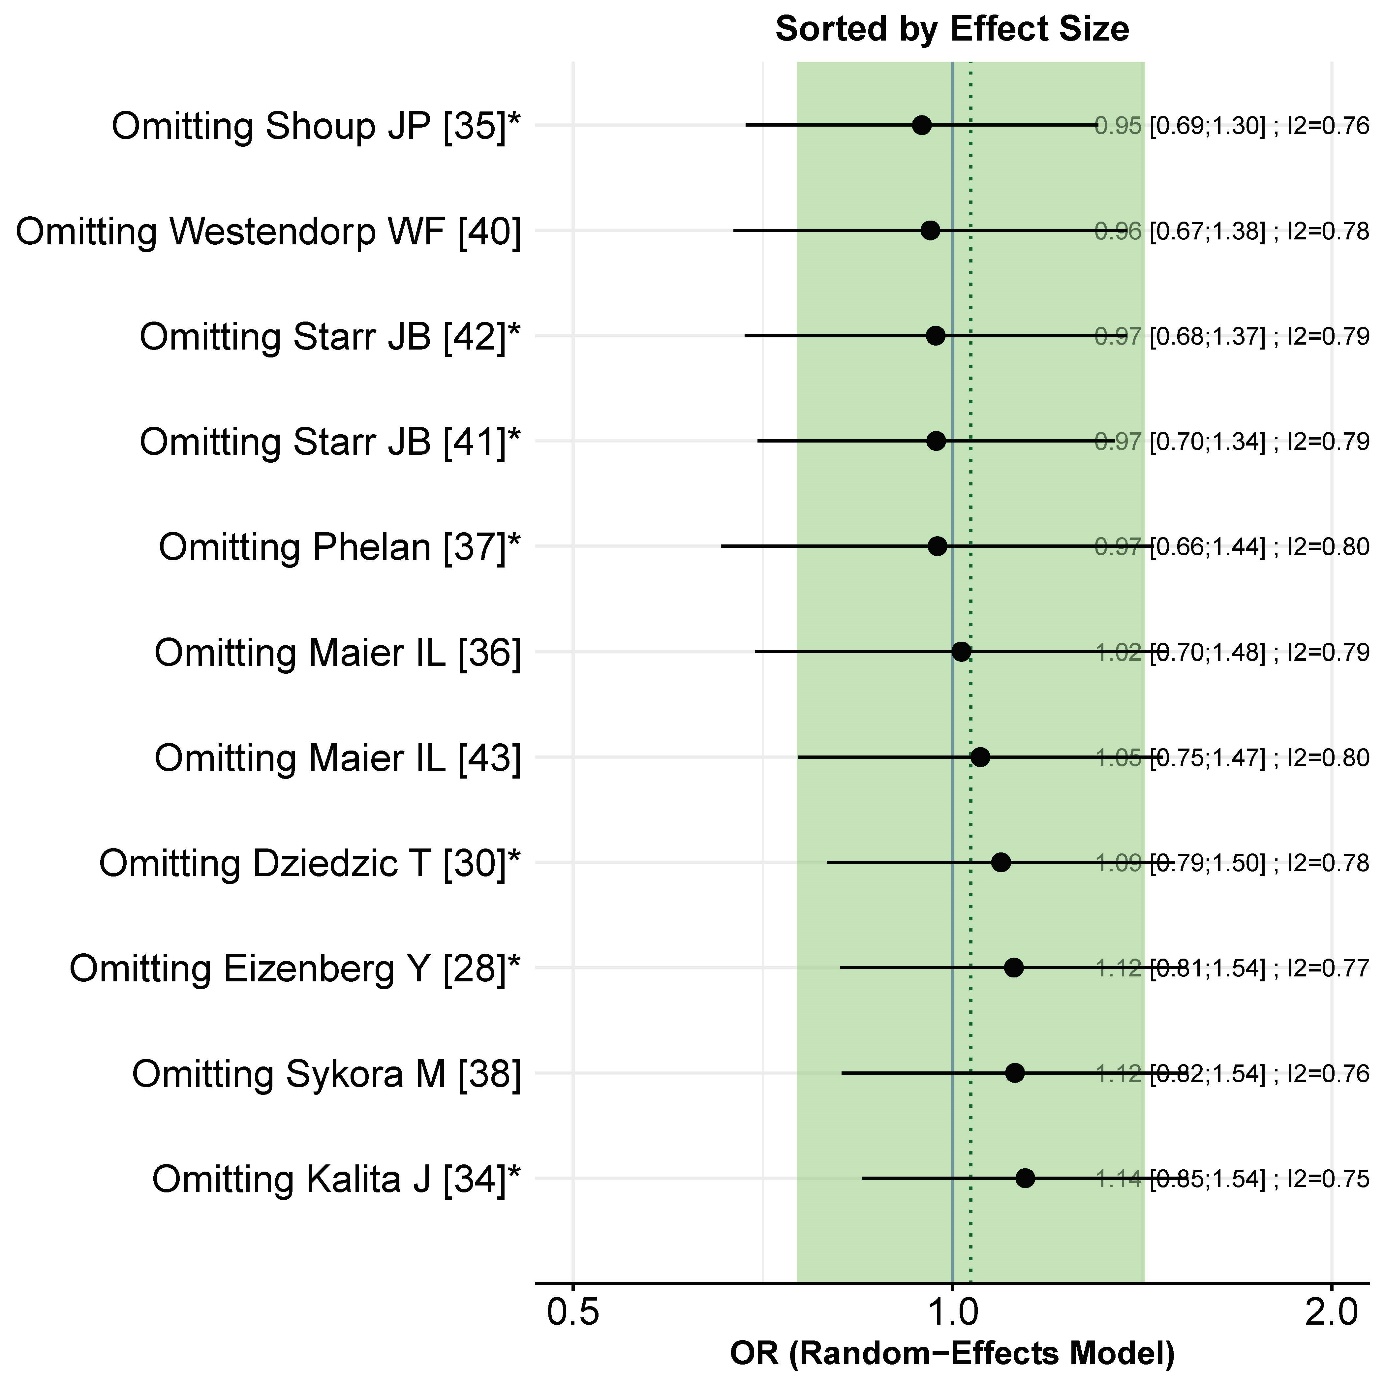


Figure S21. LOO (leave_one_out) method for sensitivity analysis the studies analyzed on functional outcome, odds ratio (OR).


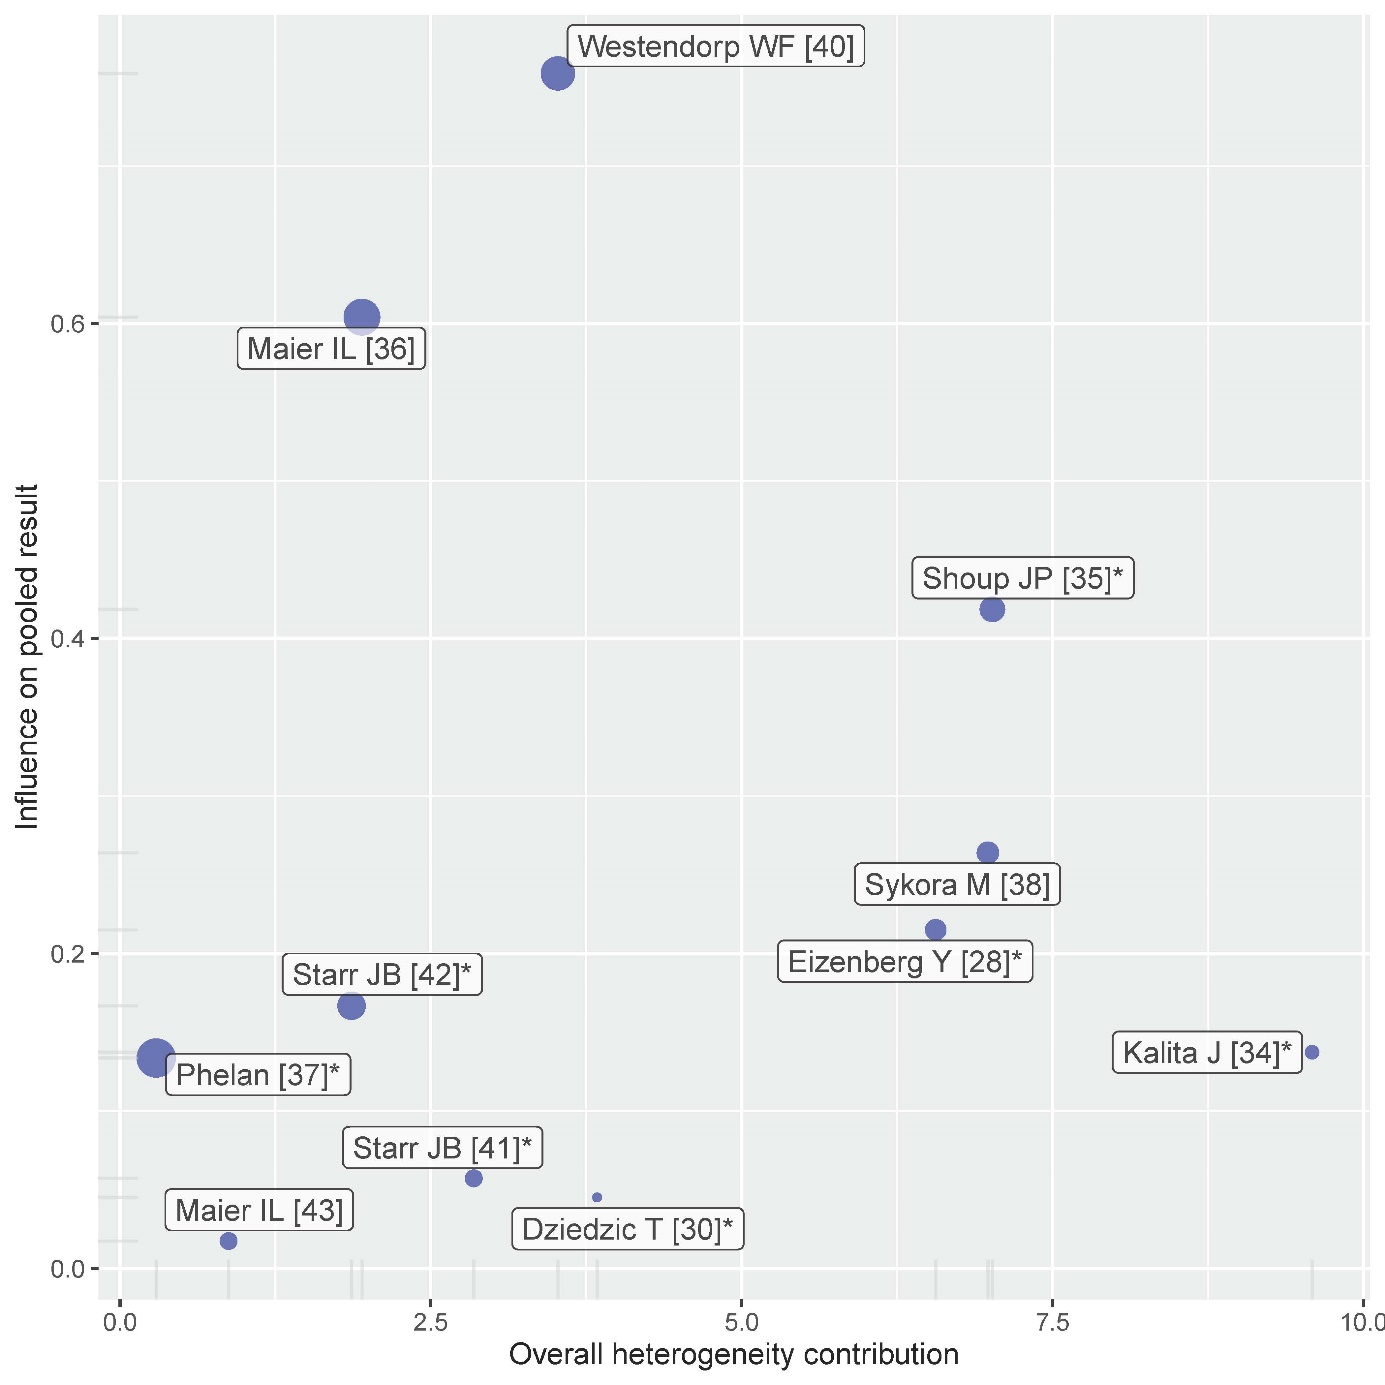


Figure S22. Baujat plot demonstrating the source of heterogeneity the studies analyzed on functional outcome, odds ratio (OR).


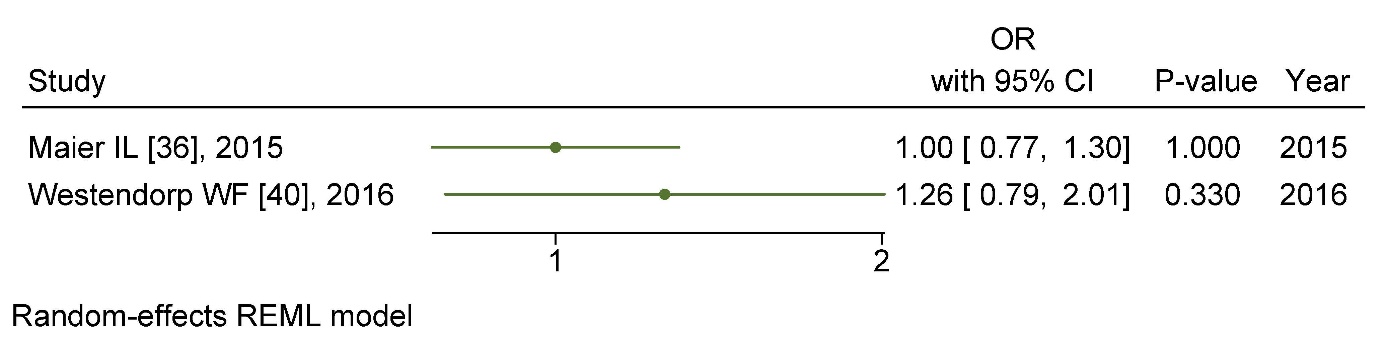


Figure S23. Cumulative meta-analysis the studies presenting adjusted (for stroke severity and age) odds ratio (OR) for the outcome functional outcome.


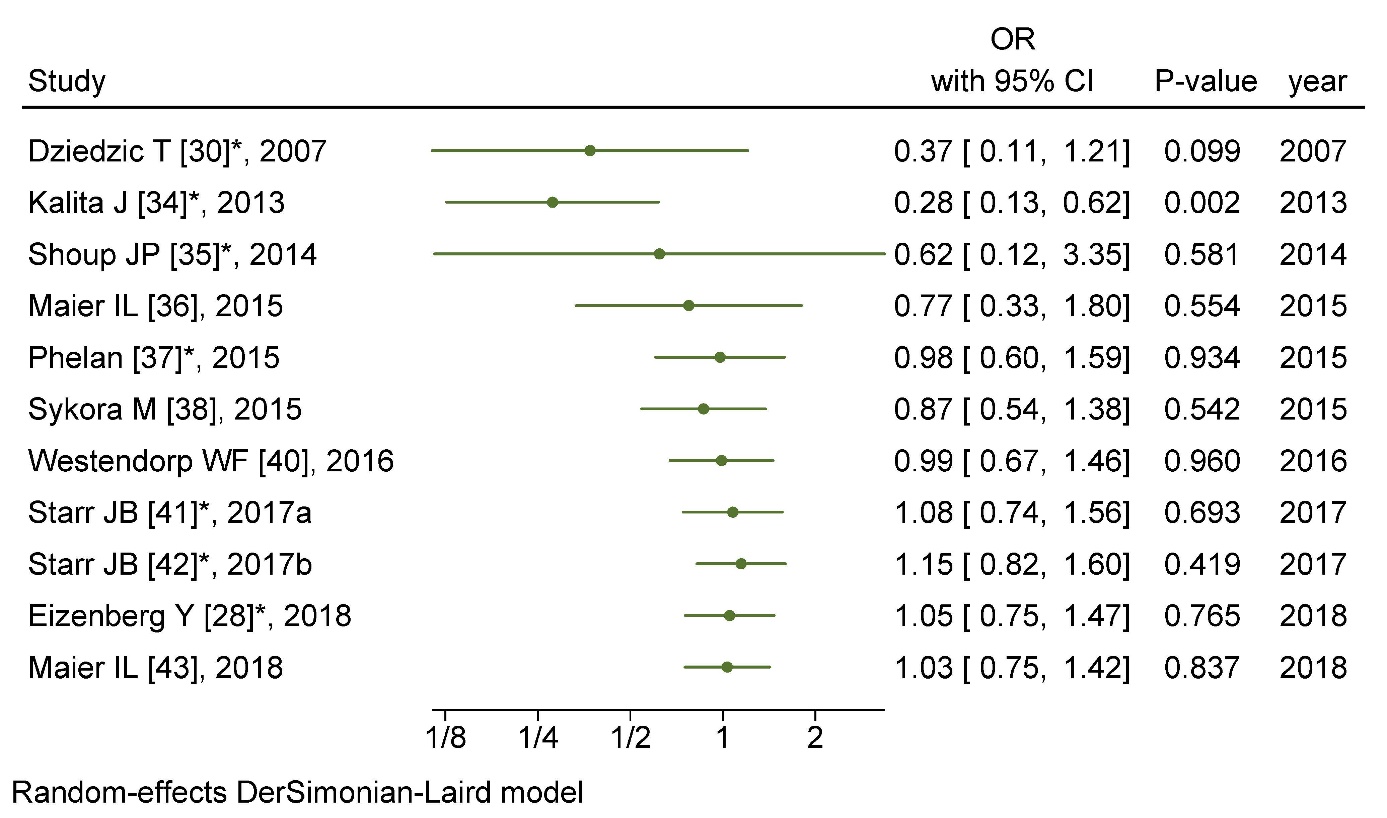


Figure S24. Cumulative meta-analysis the studies analyzed on functional outcome, odds ratio (OR).

| TABLE S7. Summary of findings table | | | | | | | | | | | | |
| --- | --- | --- | --- | --- | --- | --- | --- | --- | --- | --- | --- | --- |
| **Certainty assessment** | | | | | | | **№ of patients** | | **Effect** | | **Certainty** | **Importance** |
| **№ of studies** | **Study design** | **Risk of bias** | **Inconsistency** | **Indirectness** | **Imprecision** | **Other considerations** | **Beta-blockers** | **Non-beta-blockers** | **Relative (95% CI)** | **Absolute (95% CI)** |
| **Mortality** | | | | | | | | | | | | |
| 18 | observational studies | serious a | serious b | not serious | not serious | publication bias strongly suspected c | 26186/116540 (22.5%) | 90354/116540 (77.5%) | **RR 0.94** (0.79 to 1.12) | **47 fewer per 1 000** (from 163 fewer to 93 more) | ⨁◯◯◯ VERY LOW | NOT IMPORTANT |
| **Mortality subanalysis** | | | | | | | | | | | | |
| 10 | observational studies | not serious | serious d | not serious | not serious | none | 5557/17001 (32.7%) | 11444/17001 (67.3%) | **RR 0.90** (0.65 to 1.24) | **67 fewer per 1 000** (from 236 fewer to 162 more) | ⨁◯◯◯ VERY LOW | IMPORTANT |
| **Functional outcome** | | | | | | | | | | | | |
| 11 | observational studies | serious e | not serious | not serious | not serious | none | 4503/19122 (23.5%) | 14619/19122 (76.5%) | **OR 0.99** (0.91 to 1.08) | **2 fewer per 1 000** (from 17 fewer to 14 more) | ⨁◯◯◯ VERY LOW | NOT IMPORTANT |
| **Functional outcome subanalysis** | | | | | | | | | | | | |
| 3 | observational studies | not serious | not serious | not serious | not serious | none | 2988/9038 (33.1%) | 6050/9038 (66.9%) | **OR 1.04** (0.92 to 1.18) | **9 more per 1 000** (from 19 fewer to 36 more) | ⨁⨁◯◯ LOW | IMPORTANT |
| **Infection** | | | | | | | | | | | | |
| 11 | observational studies | serious f | serious g | not serious | not serious | publication bias strongly suspected | 3324/14305 (23.2%) | 10981/14305 (76.8%) | **OR 1.03** (0.75 to 1.42) | **5 more per 1 000** (from 55 fewer to 57 more) | ⨁◯◯◯ VERY LOW | NOT IMPORTANT |
| **Infection subanalysis** | | | | | | | | | | | | |
| 2 | observational studies | not serious | serious h | not serious | not serious | none | 1186/3158 (37.6%) | 1972/3158 (62.4%) | **OR 1.26** (0.79 to 2.01) | **52 more per 1 000** (from 57 fewer to 145 more) | ⨁◯◯◯ VERY LOW | IMPORTANT |

**CI:** Confidence interval; **RR:** Risk ratio; **OR:** Odds ratio

**Explanations**

a. 8 of the 18 assessed studies didn´t present adjusted data for age and stroke severity for our analysis, se Table S5

b. The studies proved to be heterogeneous (I2 95.9% p = 0.000 )

c. Egger’s test showed significant (p = 0.014; funnel plot in Figure S8) risk for publication bias

d. The studies proved to be heterogeneous (I2=89.1% ORs; p = 0.000)

e. 8 of the 11 assessed studies didn´t present adjusted data for age and stroke severity for our analysis, se Table S5

f. 9 of the 11 assessed studies didn´t present adjusted data for age and stroke severity for our analysis, se Table S5

g. The studies were heterogeneous, ( I2 = 77.9%, p = 0.000 )

h. The studies were heterogeneous, (I2=81.6%, p=0.020 )
